# Supplementary material for: Prevalence of anxiety and depressive symptoms and their association with multimorbidity and demographic factors: a community-based, cross-sectional survey in Karachi, Pakistan
Source: PubMed Central journal article supplement — BMJ Open. 2019 Nov 19;9(11):e029315. doi: 10.1136/bmjopen-2019-029315 (PMC6887067; doi:10.1136/bmjopen-2019-029315), 2019-11-19
Supplement: bmjopen-2019-029315.draft_revisions.pdf [file bmjopen-2019-029315.draft_revisions.pdf]

# BMJ Open

BMJ Open is committed to open peer review. As part of this commitment we make the peer review history of every article we publish publicly available.

When an article is published we post the peer reviewers' comments and the authors' responses online. We also post the versions of the paper that were used during peer review. These are the versions that the peer review comments apply to.

The versions of the paper that follow are the versions that were submitted during the peer review process. They are not the versions of record or the final published versions. They should not be cited or distributed as the published version of this manuscript.

BMJ Open is an open access journal and the full, final, typeset and author-corrected version of record of the manuscript is available on our site with no access controls, subscription charges or pay-per-view fees (<http://bmjopen.bmj.com>).

If you have any questions on BMJ Open's open peer review process please email [info.bmjopen@bmj.com](mailto:info.bmjopen@bmj.com)

# BMJ Open

## Prevalence of anxiety and depressive symptoms and its association with multimorbidity and demographic factors among adults in Karachi, Pakistan

|                               |                                                                                                                                                                                                                                                                                                                                                      |
|-------------------------------|------------------------------------------------------------------------------------------------------------------------------------------------------------------------------------------------------------------------------------------------------------------------------------------------------------------------------------------------------|
| Journal:                      | <i>BMJ Open</i>                                                                                                                                                                                                                                                                                                                                      |
| Manuscript ID                 | bmjopen-2019-029315                                                                                                                                                                                                                                                                                                                                  |
| Article Type:                 | Research                                                                                                                                                                                                                                                                                                                                             |
| Date Submitted by the Author: | 18-Mar-2019                                                                                                                                                                                                                                                                                                                                          |
| Complete List of Authors:     | Farooq, Salima; Aga Khan University Faculty of Health Sciences, Institute of Nursing<br>Khan, Tahir; School of Public Health,<br>Zaheer, Sidra; Dow University of Health Sciences, School of Public Health<br>Shafique, Kashif; Dow University of Health Sciences, School of Public Health; University of Glasgow, Institute of Health and Wellbeing |
| Keywords:                     | Multi-morbidity, Anxiety and Depression, Adult health                                                                                                                                                                                                                                                                                                |
|                               |                                                                                                                                                                                                                                                                                                                                                      |

SCHOLARONE™  
Manuscripts

# Prevalence of anxiety and depressive symptoms and its association with multimorbidity and demographic factors among adults in Karachi, Pakistan

## Author Details

### 1. Salima Farooq

School of Nursing and Midwifery

Aga Khan University, Karachi

[salima.farooq@aku.edu](mailto:salima.farooq@aku.edu)

021-34865274

### 2. Muhammad Tahir Khan (Corresponding Author)

School of Public Health

Dow University of Health Science

[tahir.khan@duhs.edu.pk](mailto:tahir.khan@duhs.edu.pk)

+92 300 9257633

### 3. Sidra Zaheer

School of Public Health

Dow University of Health Science

[sidra.zaheer@duhs.edu.pk](mailto:sidra.zaheer@duhs.edu.pk)

### 4. Kashif Shafique

School of Public Health

Dow University of Health Science

[k.shafique@duhs.edu.pk](mailto:k.shafique@duhs.edu.pk)

Institute of Health and Wellbeing,

Public Health, University of Glasgow,

Glasgow, United Kingdom

[kashif.shafique@glasgow.ac.uk](mailto:kashif.shafique@glasgow.ac.uk)

## Details of manuscript:

**Total words count of manuscript excluding tables, references and abstract: 2956**

**Word count of abstract: 191**

**Number of tables: 03**

**Number of figures: Zero (0)**

## Abstract

### Objectives

This study aimed to estimate the prevalence of anxiety and depressive symptoms and its association with multimorbidity and demographic characteristic of adults aged 30 years and above in Karachi, Pakistan.

### Design

Analytical Cross-sectional

### Study Setting and Participants

The study was carried out among a general population aged 30 years and above, residing in the Gulshan-e-Iqbal town of Karachi, Pakistan.

### Main Outcome Measures

Presence of anxiety and depressive symptoms assessed via Aga Khan University Anxiety Depression Scale (AKUADS).

### Results

The magnitude of anxiety and depressive symptoms was reported as 27.4%. The final multivariate logistic regression revealed that the presence of multimorbidity (AOR=1.34, 95% CI: 1.13, 1.59), the female gender (AOR= 2.41, 95% CI: 1.99, 2.91), illiteracy (AOR=1.59, 95% CI: 1.15, 2.21), the Punjabi ethnicity (AOR=1.69, 95% CI: 1.18, 2.42), and visiting a faith healer (AOR=2.34, 95% CI: 1.86, 2.95) were the significant predictors of anxiety and depressive symptoms.

## Conclusion

This study found an alarmingly high burden of anxiety and depressive symptoms among adults aged 30 years and above in Karachi, Pakistan. Multimorbidity, the female gender, ethnicity, illiteracy, and visiting faith healers were predictors of anxiety and depressive symptoms in the country.

### *Key words*

Multimorbidity, anxiety and depression, adults,

### **Strengths and limitations of this study**

- The sample population of this study is representing all union councils of Gulshan Town, Karachi.
- A validated screening tool (AKUADS) was used to assess the presence of anxiety and depressive symptoms.
- This was a cross-sectional survey, so inferences could not be drawn related to causality.
- Our study was based on self-reported information on multimorbidity and anxiety and depression this might have either underestimated or overestimated its prevalence and hence association.

## Introduction

Anxiety and depressive symptoms are major public health issues globally. Depression has been ranked the fourth leading cause of disease burden (1). It is predicted that by the year 2020, it will be the second leading cause of disability and death, after cardio vascular disorders (1-4). The magnitude of anxiety and depression are on the rise in the general population. However, individuals with chronic diseases are at even higher risk of anxiety and depressive symptoms (5-8).

Multimorbidity is the co-occurrence of two or more chronic diseases such as cancer, diabetes, hypertension, stroke, asthma, heart disease, arthritis or osteoporosis within an individual (3, 9, 10). Research found that one in four adults in developed countries have multimorbidity (11, 12). On the other hand, low and middle income countries were the home of 80% of chronic illnesses (13). Another study found that 52% of populations between the ages of 21 to 84 were suffering from multimorbidity (14). Whereas, a study conducted by Garin et al (15) in 2014 found a 67% burden of multimorbidity among elder Spanish females. Reasons for variation in prevalence could be due to the differences in multimorbidity definitions, number of chronic conditions included in studies, diagnostic criteria for medical conditions, and a study's sample size and population characteristics. Literature suggested that the prevalence of multimorbidity rises with age (10, 16) and this burden is reported most commonly in females. Additionally, individuals living in underprivileged areas are at a higher risk of developing multimorbidity (17).

Health care providers often face challenges when dealing with clients who have multimorbidity along with anxiety and depressive symptoms (18, 19) As multimorbidity conditions such as diabetes, hypertension, stroke, asthma, arthritis and osteoporosis have

1  
2  
3 synergetic effect with anxiety and depression, it increases the probability of disabilities among  
4 patients. (5). The magnitude of anxiety and depression with multimorbidity leads to increased  
5 rates of utilizing health care facilities. This consequently leads to financial health care burdens  
6 and poorer health outcomes (11, 20). Individuals with multimorbidity need to deal with multiple  
7 treatment recommendations (8). Thus, anxiety and depression with multimorbidity is linked with  
8 50% to 100% of the utilization of health services and cost (21)  
9

10  
11  
12  
13  
14  
15  
16  
17 Anxiety and depression are extremely common and alarmingly underdiagnosed  
18 healthcare problems, especially in low income countries. In addition, it is associated with social  
19 and self-stigma, which create barrier to mental help seeking behavior of individuals who suffer  
20 from mental health issues, which leads to an even greater public health concern. Furthermore,  
21 anxiety and depression are specifically reported to be common in individuals with  
22 multimorbidity (5, 8). However, the studies reporting these associations are mostly conducted in  
23 high income countries. To the best of our knowledge, no such population based study has been  
24 reported from Pakistan. In a resource limited setting like Pakistan, under diagnosis of mental  
25 illnesses can cause potential delay in the initiation of treatment. Hence, it is of utmost importance  
26 that anxiety and depression be screened in adults suffering from multimorbidity in order to  
27 reduce the burden of complications and suboptimal adherence to the treatment of multimorbidity  
28 conditions. Therefore, scarcity of literature from Pakistan requires quantification of the  
29 association between anxiety and depression with multimorbidity within the Pakistani  
30 population. Thus, the purpose of this study was to estimate the prevalence of anxiety and  
31 depressive symptoms and determine the association with multimorbidity and demographic  
32 factors among adults aged 30 years and above in Karachi, Pakistan  
33  
34  
35  
36  
37  
38  
39  
40  
41  
42  
43  
44  
45  
46  
47  
48  
49  
50  
51  
52  
53  
54  
55  
56  
57  
58  
59  
60

## Methodology

This study was a part of a larger community based research project titled “The Burden of Multimorbidity, Its Patterns and Consequences on Health and Well-Being: The IMPACT Study”. The aim of this cross-sectional study was to estimate the burden of anxiety and depressive symptoms and identify the factors associated with multimorbidity. The present study was conducted in the Gulshan-e-Iqbal town of Karachi, Pakistan. A sample of 3250 participants were recruited by using systematic random sampling. This required sample was achieved by using proportionate estimates of the number of individuals in 13 Union Councils (UCs) in the selected town. A Proportionate allocation method was used in order to allocate appropriate weightage to each UC. Within each UC, blocks of houses were selected with a random start, where every 109<sup>th</sup> (k<sup>th</sup> sampling interval) household was selected. Individuals within these households who met eligibility criteria were included in the study.

The Aga Khan University Anxiety Depression Scale (AKUADS) was used to assess anxiety and depressive symptoms of the participants. The cutoff score of the scale was 20. At cutoff score of 20, the AKUADS had a sensitivity of 66% and a specificity of 79% (22, 23). The Urdu version of the tool has been validated in the previous research (22). The value of the reliability coefficient tool in our study’s population was 0.93.

The study’s proposal was approved by The Institutional Review Board (IRB) of Dow University Health Sciences, reference number: Ref: IRB-554/DUHS/Approval/2015/04. Individuals who provided written informed consent were interviewed. A referral plan for counseling was made for participants who scored 20 and above on the AKUADS scale.



1  
2  
3 The presence of disease was assessed by a combination of self-reported diagnosis,  
4 medication use, and laboratory findings. Self-reported disease was determined by the question:  
5  
6 “Have you ever been told by a doctor, nurse, or other health professional that you have  
7  
8 hypertension, obesity, dyslipidemia, diabetes, heart diseases (Myocardial Infarction and/or  
9  
10 chronic ischemic heart diseases), stroke, migraines, asthma and COPD, anemia, thyroid disease,  
11  
12 diseases of bones and joints, dyspepsia/peptic ulcer, hepatitis B and C, chronic kidney diseases  
13  
14 including stones, cancer, and/or disability?”. The following criteria were used to define chronic  
15  
16 diseases such as hypertension, obesity, diabetes, and dyspepsia.  
17  
18  
19  
20  
21

22 A person was said to be hypertensive if they had a high systolic BP (>140 mm Hg) or a high  
23  
24 diastolic BP (>90 mm Hg). A person is said to be obese if they had a calculated BMI  $\geq$  30.0  
25  
26 kg/m<sup>2</sup>. A person was said to be diabetic if his blood glucose levels was  $\geq$  200 mg/dl. A person  
27  
28 was said to have dyspepsia if they had four or more symptoms of dyspepsia for at least 6 months,  
29  
30 based on the Leeds Dyspepsia Questionnaire (LDQ).  
31  
32

33 Individuals with 2 or more chronic diseases (excluding anxiety and depression) were labeled as  
34  
35 having ‘multimorbidity’ and others who reported one or no chronic medical disease were labeled  
36  
37 as having ‘no multimorbidity’.  
38  
39

40 Variables were pre-coded and data was entered and analyzed in the SPSS version 19.0.  
41  
42 Descriptive statistics were calculated in the form of frequencies and percentages for categorical  
43  
44 variables. Descriptive statistics were calculated in order to estimate the prevalence of anxiety and  
45  
46 depressive symptoms. Univariate and multivariate binary logistics regressions were used to  
47  
48 assess the associations between anxiety and depressive symptoms and multimorbidity and odd  
49  
50 ratios and their 95% confidence intervals were also calculated. The multivariate model was  
51  
52  
53  
54  
55  
56  
57  
58  
59  
60

1  
2  
3 adjusted for all variables included in the univariate analysis, and we used significant cutoff as p-  
4  
5 value  $\leq 0.05$ . This manuscript has followed STROBE cross sectional reporting guidelines (24).  
6  
7

## 8 **Patient and public involvement**

9

10 Patients and public were involved in the study and the findings of the research were disseminated  
11  
12 using public health awareness programs in the union councils and through direct communication  
13  
14 with the study participants.  
15  
16  
17  
18  
19  
20  
21  
22  
23  
24  
25  
26  
27  
28  
29  
30  
31  
32  
33  
34  
35  
36  
37  
38  
39  
40  
41  
42  
43  
44  
45  
46  
47  
48  
49  
50  
51  
52  
53  
54  
55  
56  
57  
58  
59  
60

## Results

A total of 3250 participants were interviewed. However, we analyzed our data using information from 2867 study participants. 383 participants were excluded due to missing information on the variables: anxiety & depression symptoms (n=06), presence of multimorbidity (n=09), respondent age (n=06), gender (n=08), education (n=48), income (n=81), occupation (n=72), marital status (n=05), number of children (n=67), ethnicity (n=09), home status (n=14), smoking status (n=66), and visiting faith healer (n=93).

Out of 2867 study participants, 27.4% (n=786) of the participants had anxiety and depressive symptoms. Whereas, 50.2 % (n=1440) of these individuals had reported multimorbidity. In our study, there was an almost equal ratio of male 51.5 % (n=1477) to female 48.5% (n=1390). Regarding education level of the participants, 14% (n=404) had no formal education, 38.3% (n=1098) had higher education, and 20.4% (n=585) had postgraduate education. Regarding monthly household income of participants, 22.3% (n=638) reported their monthly household income to be less than 16,000 rupees and 18.2% (n=523) reported their monthly income to be more than 55,000 rupees. Majority of participants (42% (n=1205)) had professional jobs, 14% (n=389) were labor, 17% (n=484) participants were unemployed. The socio-demographic and other characteristics of the participants are shown in Table 1.

Participants with multimorbidity had higher rate of anxiety and depression symptoms, as compared to participants without multimorbidity (30.7% v/s 24.1%). Females were shown to have higher symptoms of anxiety and depression, as compared to males (36.9% v/s 18.5%). Uneducated groups were more anxious & depressed (39.9%) as compared to other education leveled groups (Primary 29.3%, Secondary 28.1%, Higher/graduate 23.3%, and Post-graduate 25.3%). The participants who had 1-2 children were less anxious & depressed (23.3%), while

1  
2  
3 those who had no children had higher levels of anxiety & depressive symptoms (30.7%). Among  
4 the different linguistic groups, Punjabi and other ethnicities had predominantly higher symptoms  
5 of anxiety and depression (32.1%), as compared to the Sindhi ethnicity (20.4%). There was a  
6 negative association with smoking and anxiety & depressive symptoms, where smokers were  
7 less depressed than nonsmokers (24.1% v/s 28.2%). The participants who used to visit faith  
8 healers were more anxious & depressed than non-visiting participants (44.4% v/s 24.4%) (Table  
9 2).

10  
11  
12  
13  
14  
15  
16  
17  
18  
19  
20 Participants who had multimorbidity had a 34% increased likelihood of being anxious and  
21 depressed (AOR=1.34, 95% CI: 1.13, 1.59) as compared to those who reported no  
22 multimorbidity. Females were 2.41 times more likely to have anxiety and depressive symptoms  
23 as compared to male participants (AOR= 2.41, 95% CI: 1.99, 2.91). The odds of having anxiety  
24 and depressive symptoms were 59% higher among participants who had no formal education  
25 (AOR=1.59, 95% CI: 1.15, 2.21), as compared to participants who had postgraduate education.  
26  
27  
28  
29  
30  
31  
32  
33  
34  
35  
36  
37  
38  
39  
40  
41  
42  
43  
44  
45  
46  
47  
48  
49  
50  
51  
52  
53  
54  
55  
56  
57  
58  
59  
60  
Participants who had 1 to 2 children were 32% less likely (AOR=0.68, 95% CI: 0.55, 0.83), and  
who had 3 and above children were 25% less likely to had anxiety and depressive symptoms  
(AOR=0.75, 95% CI: 0.59, 0.94) as compared to participants who had no children.

Subjects belonging to the Punjabi ethnicity (AOR=1.69, 95% CI: 1.18, 2.42), spoke Urdu  
(AOR=1.36, 95% CL: 1.01, 1.81), and participants belonging to other ethnic groups (AOR=1.60,  
95% CL: 1.10, 2.24) were more likely to have anxiety and depressive symptoms as compared to  
Sindhi subjects. In addition, subjects who were visiting a faith healer were 2.34 times more likely  
(AOR=2.34, 95% CI: 1.86, 2.95) to exhibit anxiety and depressive symptoms as compared to  
participants who did not visit a faith healer (Table 3).

1  
2  
3  
4  
5  
6  
7  
8  
9  
10  
11  
12  
13  
14  
15  
16  
17  
18  
19  
20  
21  
22  
23  
24  
25  
26  
27  
28  
29  
30  
31  
32  
33  
34  
35  
36  
37  
38  
39  
40  
41  
42  
43  
44  
45  
46  
47  
48  
49  
50  
51  
52  
53  
54  
55  
56  
57  
58  
59  
60

For peer review only

## Discussion

This study showed that nearly one fourth of the adult population in Karachi have symptoms of anxiety and depression. This study illustrated that presence of multimorbidity, the female gender, having no children, lower level of education, and visiting a faith healer were significantly associated with higher levels of anxiety and depressive symptoms.

In the present study, an overall prevalence of anxiety and depressive symptoms was 27.4%. The prevalence of anxiety and depression was previously reported to be around 10% and 44% in developed and developing countries, respectively (25, 26). Islam et al in their study , conducted in 2003 (27), found a 28% prevalence of depression among the Bangladesh population. In the United States, the prevalence of anxiety and depression was reported to be 16.2% (28). Papadopoulos et al. (29) reported that the prevalence of depression in Greece was 27%. Whereas, in India, the prevalence of depression was found to be 28% (30). However, in Pakistan, the prevalence of depression and anxiety found to be around 30 to 50 %. (25, 26, 31, 32). A plausible reason of the difference in prevalence of anxiety and depression could be inclusion criteria, sample sizes, recruitment methods, various screening tools, as well as different cutoff points that were employed in these diverse studies (33).

In the past decade, several research studies have established a strong relationship between anxiety & depression and multimorbidity (3, 6, 8, 34). Over all, a positive association was found between the presence of multimorbidity and anxiety and depressive symptoms in our study. Our findings were in concurrence with previous studies, showing a significant association between anxiety and depression and multimorbidity.(3, 8, 35-38). A probable reason could be that mental illness is linked with an unhealthy habits such as the use of smoking, poor self-care, lack of physical activities, and poor medication compliance (36, 39).

1  
2  
3 In the present study, anxiety and depressive symptoms were found to be strongly  
4 associated with females. The prevalence of anxiety and depressive symptoms were found to be  
5 2.5 times higher in females, rather than males. Likewise, previous studies have also revealed a  
6 positive association between anxiety, depression, and gender. A research conducted by Mirza  
7 and Jenkin (31) found that the prevalence of anxiety and depressive symptoms were 29-66%  
8 among females as compared to males, which was 10-33%. A feasible reason for higher  
9 prevalence of anxiety and depression among women could be due to biological factors, socio-  
10 economical disadvantages, deprivation of social status, maladaptive coping styles, different  
11 mental help seeking behaviors, and lack of a support system for females in our country (40).  
12  
13  
14  
15  
16  
17  
18  
19  
20  
21  
22  
23  
24

25 The current study also found illiteracy as one of the potential risk factors among  
26 participants. Similarly, previous studies found a strong association between low levels of  
27 education and anxiety and depressive symptoms (41, 42). A plausible reason could be that  
28 education in facilitating adaptive coping skills to deal with distress situation and improving self-  
29 confidence, self-efficacy, social skills building and sense of control over environment (43).  
30  
31  
32  
33  
34  
35  
36

37 In our study, participants who had children were less likely to develop anxiety and  
38 depressive symptoms. In contrast, other studies found that having more children is a risk factor  
39 for anxiety and depression among women (41, 44). The plausible reason could be that parents  
40 tend to positively engage and bind to their children's lives by giving continuous love, time,  
41 support and commitment, which can all be coping strategies against distress.  
42  
43  
44  
45  
46  
47  
48

49 Our study also revealed that ethnicity of a participant is linked with anxiety and  
50 depressive symptoms. Subjects who were Punjabi and spoke Urdu were more likely to have  
51 anxiety and depressive symptoms. Consistent findings were reported by former studies that  
52  
53  
54  
55  
56  
57  
58  
59  
60

1  
2  
3 ethnicity was a significant risk factor for depression (45-47). However, another study reported  
4 no association between these variables (44).  
5  
6  
7

8 A notable finding of our study was that visiting a faith healer was positively associated  
9 with anxiety and depression among both genders. In our culture, distressed individuals seek help  
10 from traditional healers or faith healers prior to visiting a doctor or psychiatrist for their illness.  
11 The plausible reasons could be because of the stigma that is attached to utilizing mental health  
12 services (44, 48). Research has shown that only one to two psychiatrists are available to serve the  
13 one million population of Pakistan (49). Furthermore, shortage of mental help resources is one of  
14 the hindering factors linked with anxiety and depression in this country. Our result is consistent  
15 with a past study, where it was reported that sixteen percent of the Pakistani population first  
16 approach to faith healer for their illness (50).  
17  
18  
19  
20  
21  
22  
23  
24  
25  
26  
27  
28  
29

### 30 **Strengths and Limitations**

31 This is the first research that determined an association of anxiety and depressive  
32 symptoms with multimorbidity among the population in Karachi, Pakistan. Inferences could not  
33 be determined about the causality of the relationship due to cross-sectional nature of study.  
34 Potential risk factors like, family history of psychiatric disorders, marital dissatisfaction,  
35 domestic violence, maladaptive coping, current life stressors, and death of a love one that could  
36 not be addressed in the current study. This study was based on self-reported information on  
37 multimorbidity and anxiety and depression. The reliance on self-reported information might have  
38 either underestimated or overestimated its prevalence and hence association.  
39  
40  
41  
42  
43  
44  
45  
46  
47  
48  
49  
50  
51  
52  
53  
54  
55  
56  
57  
58  
59  
60



## Conclusion

Our research recognized that almost one quarter of the population had anxiety and depressive symptoms. Among females, anxiety and depressive symptoms are twice as common, as compared to males. Early prevention and screenings are key measures to prevent the rising burden of mental disorders when dealing with chronic physical conditions. In order for this to happen, health care professionals need to be trained in the multidisciplinary handling of physical and mental illnesses.. In addition, general physicians should be well equipped with the knowledge of signs and symptoms of anxiety and depressive symptoms.

## Author Contributions

SF conceived the research question, conducted all the literature reviews, data collection, and management, and manuscript drafting and reviewing. MTK reviewed the manuscript and helped in data analysis. SZ helped in the analysis and preparation of tables. KS supervised the research project and conducted the final editing and review of the manuscript. The final version of manuscript was seen and approved by all contributors.

## Conflicts of Interest

None

## Data Statement

Data is available on request

## Funding

None

## Acknowledgement

1  
2  
3 We would like to acknowledge the contributions of Ms. Yasmin Parpio and Ms. Serena Alidina  
4  
5 in this research work.  
6  
7  
8  
9  
10  
11  
12  
13  
14  
15  
16  
17  
18  
19  
20  
21  
22  
23  
24  
25  
26  
27  
28  
29  
30  
31  
32  
33  
34  
35  
36  
37  
38  
39  
40  
41  
42  
43  
44  
45  
46  
47  
48  
49  
50  
51  
52  
53  
54  
55  
56  
57  
58  
59  
60

For peer review only

## References

1. Moussavi S, Chatterji S, Verdes E, Tandon A, Patel V, Ustun B. Depression, chronic disease and decrements in health: Evidence from the World Health Surveys. *Lancet*. 2007;369:851-8.
2. Mathers C, Fat DM, Boerma JT. The global burden of disease: 2004 update: World Health Organization; 2008.
3. O'Connor K, Vizcaino M, Ibarra JM, Balcazar H, Perez E, Flores L, et al. Multimorbidity in a Mexican Community: Secondary Analysis of Chronic Illness and Depression Outcomes. *International journal of nursing (New York, NY)*. 2015;2(1):35.
4. WHO. Depression and other common mental disorders: global health estimates. 2017.
5. Deschênes SS, Burns RJ, Schmitz N. Associations between depression, chronic physical health conditions, and disability in a community sample: A focus on the persistence of depression. *Journal of affective disorders*. 2015;179:6-13.
6. Winkler P, Horáček J, Weissová A, Šustr M, Brunovský M. Physical Comorbidities in Depression Co-Occurring with Anxiety: A Cross Sectional Study in the Czech Primary Care System. *International journal of environmental research and public health*. 2015;12(12):15728-38.
7. Levinson D, Karger CJ, Haklai Z. Chronic physical conditions and use of health services among persons with mental disorders—results from the Israel National Health Survey. *General hospital psychiatry*. 2008;30(3):226-32.
8. Gunn JM, Ayton DR, Densley K, Pallant JF, Chondros P, Herrman HE, et al. The association between chronic illness, multimorbidity and depressive symptoms in an Australian primary care cohort. *Social psychiatry and psychiatric epidemiology*. 2012;47(2):175-84.
9. Khanam MA, Streatfield PK, Kabir ZN, Qiu C, Cornelius C, Wahlin Å. Prevalence and patterns of multimorbidity among elderly people in rural Bangladesh: a cross-sectional study. *Journal of health, population, and nutrition*. 2011;29(4):406.
10. Liddy C, Blazkho V, Mill K. Challenges of self-management when living with multiple chronic conditions Systematic review of the qualitative literature. *Canadian Family Physician*. 2014;60(12):1123-33.
11. Ahmadi B, Alimohammadian M, Yaseri M, Majidi A, Boreiri M, Islami F, et al. Multimorbidity: Epidemiology and Risk Factors in the Golestan Cohort Study, Iran: A Cross-Sectional Analysis. *Medicine*. 2016;95(7):e2756.
12. Alaba O, Chola L. The social determinants of multimorbidity in South Africa. *Int J Equity Health*. 2013;12(1):1-10.
13. Chatterji S, Byles J, Cutler D, Seeman T, Verdes E. Health, functioning, and disability in older adults—present status and future implications. *The Lancet*. 2015;385(9967):563-75.
14. Aarts S, van den Akker M, Bosma H, Tan F, Verhey F, Metsemakers J, et al. The effect of multimorbidity on health related functioning: Temporary or persistent? Results from a longitudinal cohort study. *Journal of psychosomatic research*. 2012;73(3):211-7.
15. Garin N, Olaya B, Perales J, Moneta MV, Miret M, Ayuso-Mateos JL, et al. Multimorbidity patterns in a national representative sample of the Spanish adult population. *PloS one*. 2014;9(1).
16. Marengoni A, Angleman S, Melis R, Mangialasche F, Karp A, Garmen A, et al. Aging with multimorbidity: a systematic review of the literature. *Ageing research reviews*. 2011;10(4):430-9.
17. Orueta JF, Nuño-Solinís R, García-Alvarez A, Alonso-Morán E. Prevalence of multimorbidity according to the deprivation level among the elderly in the Basque Country. *BMC public health*. 2013;13(1):918.

18. Roca M, Gili M, Garcia-Garcia M, Salva J, Vives M, Campayo JG, et al. Prevalence and comorbidity of common mental disorders in primary care. *Journal of affective disorders*. 2009;119(1):52-8.
19. Naqvi H, Khan MM. Depression in primary care: difficulties and paradoxes. *JPMA* 2005;55(9):393.
20. Uijen AA, van de Lisdonk EH. Multimorbidity in primary care: prevalence and trend over the last 20 years. *The European journal of general practice*. 2008;14(sup1):28-32.
21. Simon GE, VonKorff M, Barlow W. Health care costs of primary care patients with recognized depression. *Archives of general psychiatry*. 1995;52(10):850-6.
22. Ali BS. Validation of an indigenous screening questionnaire for anxiety and depression in an urban squatter settlement of Karachi. *J Coll Physicians Surg Pak*. 1998;8:207-11.
23. Ali BS, Reza H. Development of an indigenous screening instrument in Pakistan: the Aga Khan University Anxiety and Depression Scale. *JPMA* 1998;48:261-5.
24. Von Elm E, Altman DG, Egger M, Pocock SJ, Gøtzsche PC, Vandenbroucke JP, et al. The Strengthening the Reporting of Observational Studies in Epidemiology (STROBE) statement: guidelines for reporting observational studies. *PLoS medicine*. 2007;4(10):e296.
25. Luni FK, Ansari B, Jawad A, Dawson A, Baig SM. Prevalence of depression and anxiety in a village in Sindh. *J Ayub Med Coll Abbottabad*. 2009;21(2):68-72.
26. Muhammad Gadit AA, Mugford G. Prevalence of depression among households in three capital cities of Pakistan: need to revise the mental health policy. *Plos one*. 2007;2(2):e209.
27. Islam MM, Ali M, Ferroni P, Underwood P, Alam MF. Prevalence of psychiatric disorders in an urban community in Bangladesh. *General hospital psychiatry*. 2003;25(5):353-7.
28. Kessler RC, Berglund P, Demler O, Jin R, Koretz D, Merikangas KR, et al. The epidemiology of major depressive disorder: results from the National Comorbidity Survey Replication (NCS-R). *JAMA*. 2003;289(23):3095-105.
29. Papadopoulou F, Petridou E, Argyropoulou S, Kontaxakis V, Dessypris N, Anastasiou A, et al. Prevalence and correlates of depression in late life: a population based study from a rural Greek town. *Int J Geriatr Psychiatry*. 2005;20(4):350-7.
30. Patel V, Prince M. Ageing and mental health in a developing country: who cares? Qualitative studies from Goa, India. *Psychological Medicine*. 2001;31(01):29-38.
31. Mirza I, Jenkins R. Risk factors, prevalence, and treatment of anxiety and depressive disorders in Pakistan: systematic review. *Bmj*. 2004;328(7443):794.
32. Ali B, Amanullah S. Prevalence of anxiety and depression in an urban squatter settlement of Karachi. *JCPSP, Journal of the College of Physicians and Surgeons-Pakistan*. 2000;10(1):4-6.
33. Taylor AW, Price K, Gill TK, Adams R, Pilkington R, Carrangis N, et al. Multimorbidity-not just an older person's issue. Results from an Australian biomedical study. *BMC public health*. 2010;10(1):1.
34. Smith DJ, McLean G, Martin D, Langan MJ, Guthrie B, Gunn J, et al. Depression and multimorbidity: a cross-sectional study of 1,751,841 patients in primary care. *The Journal of clinical psychiatry*. 2014;75(11):1202-8.
35. Patten SB. Long-term medical conditions and major depression in a Canadian population study at waves 1 and 2. *Journal of affective disorders*. 2001;63(1):35-41.
36. Patten SB. An analysis of data from two general health surveys found that increased incidence and duration contributed to elevated prevalence of major depression in persons with chronic medical conditions. *Journal of clinical epidemiology*. 2005;58(2):184-9.
37. Patten SB, Wang JL, Williams JV, Currie S. Descriptive epidemiology of major depression in Canada. *Canadian journal of psychiatry*. 2006;51(2):84.

- 1  
2  
3 38. Spangenberg L, Forkmann T, Braehler E, Glaesmer H. The association of depression and  
4 multimorbidity in the elderly: implications for the assessment of depression. *Psychogeriatrics*.  
5 2011;11(4):227-34.  
6 39. Katon WJ. Clinical and health services relationships between major depression, depressive  
7 symptoms, and general medical illness. *Biological psychiatry*. 2003;54(3):216-26.  
8 40. Zahidie A, Jamali T. An overview of the predictors of depression among adult Pakistani women.  
9 *Journal of the College of Physicians and Surgeons Pakistan*. 2013;23(8):574.  
10 41. Husain N, Creed F, Tomenson B. Depression and social stress in Pakistan. *Psychological*  
11 *medicine*. 2000;30(02):395-402.  
12 42. Lovisi GM, Lopez J, Coutinho ESF, Patel V. Poverty, violence and depression during pregnancy: a  
13 survey of mothers attending a public hospital in Brazil. *Psychological Medicine*. 2005;35(10):1485-92.  
14 43. Harpham T. Urbanization and mental health in developing countries: a research role for social  
15 scientists, public health professionals and social psychiatrists. *Social science & medicine*. 1994;39(2):233-  
16 45.  
17 44. Nisar N, Billoo N, Gadit A. Prevalence of depression and the associated risks factors among adult  
18 women in a fishing community. *JPMA*. 2004;54(10):519-25.  
19 45. Riolo SA, Nguyen TA, Greden JF, King CA. Prevalence of depression by race/ethnicity: findings  
20 from the National Health and Nutrition Examination Survey III. *American Journal of Public Health*.  
21 2005;95(6):998-1000.  
22 46. Costello DM, Swendsen J, Rose JS, Dierker LC. Risk and protective factors associated with  
23 trajectories of depressed mood from adolescence to early adulthood. *Journal of consulting and clinical*  
24 *psychology*. 2008;76(2):173.  
25 47. Lankarani MM, Assari S. Association between number of comorbid medical conditions and  
26 depression among individuals with diabetes; race and ethnic variations. *Journal of Diabetes & Metabolic*  
27 *Disorders*. 2015;14(1):1.  
28 48. Mishra N, Nagpal SS, Chadda RK, Sood M. Help-seeking behavior of patients with mental health  
29 problems visiting a tertiary care center in north India. *Indian journal of psychiatry*. 2011;53(3):234.  
30 49. Khalily MT. Mental health problems in Pakistani society as a consequence of violence and  
31 trauma: a case for better integration of care. *International journal of integrated care*. 2011;11(4).  
32 50. Mubbashar M, Saeed K. Development of mental health services in Pakistan. *Eastern*  
33 *Mediterranean health journal*. 2001;7:392-6.  
34  
35  
36  
37  
38  
39  
40  
41  
42  
43  
44  
45  
46  
47  
48  
49  
50  
51  
52  
53  
54  
55  
56  
57  
58  
59  
60

**Table 1: Socio-demographic and other characteristics of participants (n=2867)**

| Characteristics                        | n (%)       |
|----------------------------------------|-------------|
| <b>Anxiety and depressive symptoms</b> |             |
| No                                     | 2081 (72.6) |
| Yes                                    | 786 (27.4)  |
| <b>Presence of multimorbidity</b>      |             |
| No                                     | 1427 (49.8) |
| Yes                                    | 1440 (50.2) |
| <b>Age</b>                             |             |
| 30-39 years                            | 1062 (37.0) |
| 40-49 years                            | 816 (28.5)  |
| 50-59 years                            | 570 (19.9)  |
| 60-69 years                            | 293 (10.2)  |
| ≥70 years                              | 126 (4.4)   |
| <b>Gender</b>                          |             |
| Male                                   | 1477 (51.5) |
| Female                                 | 1390 (48.5) |
| <b>Education</b>                       |             |
| No education                           | 404 (14.1)  |
| Primary                                | 133 (4.6)   |
| Secondary                              | 647 (22.6)  |
| Higher/Graduation                      | 1098 (38.3) |
| Post-graduate                          | 585 (20.4)  |
| <b>Income</b>                          |             |
| <16,000                                | 638 (22.3)  |
| 16,001-24,999                          | 426 (14.9)  |
| 25,000-39,999                          | 636 (22.2)  |
| 40,000-54,999                          | 644 (22.5)  |
| >55,000                                | 523 (18.2)  |
| <b>Occupation</b>                      |             |
| Unemployed                             | 484 (16.9)  |
| Unskilled worker                       | 243 (8.5)   |
| Skilled worker                         | 250 (8.7)   |
| Labor work                             | 389 (13.6)  |
| Non-manual work                        | 296 (10.3)  |
| Professional office job                | 1205 (42)   |
| <b>Marital status</b>                  |             |
| Never Married                          | 272 (9.5)   |
| Currently Married                      | 2437 (85.0) |
| Widowed/Separated/Divorced             | 158 (5.5)   |

**Numbers of Children**

|                      |             |
|----------------------|-------------|
| No child             | 1250 (43.6) |
| 1-2 children         | 974 (34.0)  |
| 3 and above children | 643 (22.4)  |

**Ethnicity**

|         |             |
|---------|-------------|
| Sindhi  | 402 (14.0)  |
| Punjabi | 318 (11.1)  |
| Balochi | 94 (3.3)    |
| Pashtu  | 176 (6.1)   |
| Urdu    | 1534 (53.5) |
| Others  | 343 (12.0)  |

**Home Status**

|                   |             |
|-------------------|-------------|
| Own               | 1595 (55.6) |
| Rent              | 1155 (40.3) |
| Other Arrangement | 117 (4.1)   |

**Smoking Status**

|     |             |
|-----|-------------|
| No  | 2323 (81.0) |
| Yes | 544 (19.0)  |

**Visiting Faith Healer**

|     |             |
|-----|-------------|
| No  | 2471 (86.2) |
| Yes | 396 (13.8)  |

---

**Table 2. Association of Baseline Characteristics of Participants with Anxiety and Depressive symptoms (N=2867)**

| Characteristics                   | Anxiety and depressive symptoms |                           | p-value |
|-----------------------------------|---------------------------------|---------------------------|---------|
|                                   | No (< 20 score)<br>n (%)        | Yes (>=20 score)<br>n (%) |         |
| <b>Presence of multimorbidity</b> |                                 |                           |         |
| No                                | 1083 (75.9)                     | 344 (24.1)                | <0.001  |
| Yes                               | 998 (69.3)                      | 442 (30.7)                |         |
| <b>Age</b>                        |                                 |                           | 0.457   |
| 30-39 years                       | 777 (73.2)                      | 285 (26.8)                |         |
| 40-49 years                       | 604 (74.0)                      | 212 (26.0)                |         |
| 50-59 years                       | 401 (70.4)                      | 169 (29.6)                |         |
| 60-69 years                       | 213 (72.7)                      | 80 (27.3)                 |         |
| ≥70 years                         | 86 (68.3)                       | 40 (31.7)                 |         |
| <b>Gender</b>                     |                                 |                           | <0.001  |
| Male                              | 1204 (81.5)                     | 273 (18.5)                |         |
| Female                            | 877 (63.1)                      | 513 (36.9)                |         |
| <b>Education</b>                  |                                 |                           | <0.001  |
| No education                      | 243 (60.1)                      | 161 (39.9)                |         |
| Primary                           | 94 (70.7)                       | 39 (29.3)                 |         |
| Secondary                         | 465 (71.9)                      | 182 (28.1)                |         |
| Higher/Graduation                 | 842 (76.7)                      | 256 (23.3)                |         |
| Post-graduate                     | 437 (74.7)                      | 148 (25.3)                |         |
| <b>Income</b>                     |                                 |                           | 0.774   |
| <16,000                           | 459 (71.9)                      | 179 (28.1)                |         |
| 16,001-24,999                     | 302 (70.9)                      | 124 (29.1)                |         |
| 25,000-39,999                     | 462 (72.6)                      | 174 (27.4)                |         |
| 40,000-54,999                     | 479 (74.4)                      | 165 (25.6)                |         |
| >55,000                           | 379 (72.5)                      | 144 (27.5)                |         |
| <b>Occupation</b>                 |                                 |                           | 0.078   |
| Unemployed                        | 363 (75.0)                      | 121 (25.0)                |         |
| Unskilled worker                  | 169 (69.5)                      | 74 (30.5)                 |         |
| Skilled worker                    | 175 (70.0)                      | 75 (30.0)                 |         |
| Labor work                        | 267 (68.6)                      | 122 (31.4)                |         |
| Non-manual work                   | 229 (77.4)                      | 67 (22.6)                 |         |
| Professional office job           | 878 (72.9)                      | 327 (27.1)                |         |
| <b>Marital status</b>             |                                 |                           | 0.018   |
| Never Married                     | 210 (77.2)                      | 62 (22.8)                 |         |
| Currently Married                 | 1769 (72.6)                     | 668 (27.4)                |         |
| Widowed/separated/divorced        | 102 (64.6)                      | 56 (35.4)                 |         |
| <b>Numbers of Children</b>        |                                 |                           | 0.001   |
| No child                          | 866 (69.3)                      | 384 (30.7)                |         |



|                              |             |            |        |
|------------------------------|-------------|------------|--------|
| 1-2 children                 | 747 (76.7)  | 227 (23.3) |        |
| 3 and above children         | 468 (72.8)  | 175 (27.2) |        |
| <b>Ethnicity</b>             |             |            |        |
| Sindhi                       | 320 (79.6)  | 82 (20.4)  | 0.003  |
| Punjabi                      | 216 (67.9)  | 102 (32.1) |        |
| Balochi                      | 71 (75.5)   | 23 (24.5)  |        |
| Pashtu                       | 123 (69.9)  | 53 (30.1)  |        |
| Urdu                         | 1118 (72.9) | 416 (27.1) |        |
| Others                       | 233 (67.9)  | 110 (32.1) |        |
| <b>Home Status</b>           |             |            |        |
| Own                          | 1149 (72.0) | 446 (28.0) | 0.301  |
| Rent                         | 840 (72.7)  | 315 (27.3) |        |
| Other Arrangement            | 92 (78.6)   | 25 (21.4)  |        |
| <b>Smoking Status</b>        |             |            |        |
| No                           | 1668 (71.8) | 655 (28.2) | 0.053  |
| Yes                          | 413 (75.9)  | 131 (24.1) |        |
| <b>Visiting Faith Healer</b> |             |            |        |
| No                           | 1861 (75.3) | 610 (24.7) | <0.001 |
| Yes                          | 220 (55.6)  | 176 (44.4) |        |

**Table 3: Univariate and multivariate analysis of factors associated with anxiety & depressive symptoms among adults (n=2867)**

| Anxiety and depressive symptoms   |      |           |         |      |           |         |
|-----------------------------------|------|-----------|---------|------|-----------|---------|
| Characteristics                   | COR  | 95% CI    | P-Value | AOR  | 95% CI    | P-Value |
| <b>Presence of multimorbidity</b> |      |           |         |      |           |         |
| No                                | 1    |           |         | 1    |           |         |
| Yes                               | 1.39 | 1.18,1.64 | <0.001  | 1.34 | 1.13,1.59 | 0.001   |
| <b>Age</b>                        |      |           |         |      |           |         |
| 30-39 years                       | 1    |           |         | 1    |           |         |
| 40-49 years                       | 0.95 | 0.77,1.77 | 0.677   | 0.90 | 0.71,1.12 | 0.345   |
| 50-59 years                       | 1.14 | 0.92,1.40 | 0.227   | 0.98 | 0.76,1.26 | 0.898   |
| 60-69 years                       | 1.02 | 0.78,1.40 | 0.873   | 0.86 | 0.62,1.18 | 0.337   |
| ≥70 years                         | 1.26 | 0.85,1.88 | 0.243   | 1.26 | 0.81,1.97 | 0.309   |
| <b>Gender</b>                     |      |           |         |      |           |         |
| Male                              | 1    |           |         | 1    |           |         |
| Female                            | 2.58 | 2.17,3.05 | <0.001  | 2.41 | 1.99,2.91 | <0.001  |
| <b>Education</b>                  |      |           |         |      |           |         |
| Post-graduate                     | 1    |           |         | 1    |           |         |
| Higher/Graduation                 | 0.89 | 0.71,1.13 | 0.363   | 0.87 | 0.68,1.12 | 0.309   |
| Secondary                         | 1.15 | 0.89,1.48 | 0.263   | 1.09 | 0.81,1.47 | 0.542   |
| Primary                           | 1.22 | 0.81,1.85 | 0.341   | 1.21 | 0.75,1.94 | 0.429   |
| No education                      | 1.95 | 1.48,2.57 | <0.001  | 1.59 | 1.15,2.21 | 0.005   |
| <b>Income</b>                     |      |           |         |      |           |         |
| >55,000                           | 1    |           |         | 1    |           |         |
| 40,000-54,999                     | 0.91 | 0.69,1.17 | 0.462   | 0.91 | 0.69,1.21 | 0.541   |
| 25,000-39,999                     | 0.99 | 0.76,1.28 | 0.947   | 0.97 | 0.72,1.31 | 0.855   |
| 16,001-24,999                     | 1.08 | 0.81,1.43 | 0.592   | 0.96 | 0.68,1.35 | 0.829   |
| <16,000                           | 1.02 | 0.79,1.32 | 0.843   | 0.79 | 0.57,1.09 | 0.158   |
| <b>Occupation</b>                 |      |           |         |      |           |         |
| Professional office job           | 1    |           |         | 1    |           |         |
| Non-manual work                   | 0.78 | 0.58,1.06 | 0.115   | 0.84 | 0.59,1.19 | 0.333   |
| Labor work                        | 1.22 | 0.95,1.57 | 0.108   | 1.41 | 1.03,1.95 | 0.034   |
| Skilled worker                    | 1.15 | 0.85,1.55 | 0.357   | 1.35 | 0.96,1.91 | 0.078   |
| Unskilled worker                  | 1.17 | 0.87,1.59 | 0.292   | 1.16 | 0.80,1.67 | 0.419   |
| Unemployed                        | 0.85 | 0.71,1.14 | 0.369   | 0.98 | 0.72,1.32 | 0.889   |
| <b>Marital status</b>             |      |           |         |      |           |         |
| Never Married                     | 1    |           |         | 1    |           |         |
| Currently Married                 | 1.27 | 0.94,1.72 | 0.104   | 1.16 | 0.84,1.61 | 0.380   |
| Widowed/separated/divorced        | 1.86 | 1.20,2.86 | 0.005   | 1.17 | 0.72,1.91 | 0.518   |
| <b>Numbers of Children</b>        |      |           |         |      |           |         |
| no child                          | 1    |           |         | 1    |           |         |

|                              |      |           |        |      |            |        |
|------------------------------|------|-----------|--------|------|------------|--------|
| 1-2 children                 | 0.68 | 0.56,0.83 | <0.001 | 0.68 | 0.55,0.83  | <0.001 |
| 3 and above children         | 0.84 | 0.68,1.04 | 1.040  | 0.75 | 0.59,0.94  | 0.014  |
| <b>Ethnicity</b>             |      |           |        |      |            |        |
| Sindhi                       | 1    |           |        | 1    |            |        |
| Punjabi                      | 1.84 | 1.31,2.58 | <0.001 | 1.69 | 1.18,2.42  | 0.004  |
| Balochi                      | 1.26 | 0.74,2.14 | 0.385  | 1.33 | 0.76,2.32  | 0.317  |
| Pashtu                       | 1.68 | 1.12,2.51 | 0.012  | 1.41 | 0.91,2.16  | 0.118  |
| Urdu                         | 1.45 | 1.11,1.89 | 0.006  | 1.36 | 1.01,1.81  | 0.037  |
| Others                       | 1.84 | 1.32,2.56 | <0.001 | 1.60 | 1.10, 2.24 | 0.012  |
| <b>Home Status</b>           |      |           |        |      |            |        |
| Own                          | 1    |           |        | 1    |            |        |
| Rent                         | 0.96 | 0.81,1.14 | 0.690  | 0.96 | 0.80,1.56  | 0.593  |
| Other Arrangement            | 0.70 | 0.44,1.10 | 0.125  | 0.64 | 0.39,1.02  | 0.070  |
| <b>Smoking Status</b>        |      |           |        |      |            |        |
| No                           | 1    |           |        | 1    |            |        |
| Yes                          | 0.80 | 0.65,1.00 | 0.053  | 0.90 | 0.71,1.14  | 0.381  |
| <b>Visiting Faith Healer</b> |      |           |        |      |            |        |
| No                           | 1    |           |        | 1    |            |        |
| Yes                          | 2.44 | 1.96,3.03 | <0.001 | 2.34 | 1.86,2.95  | <0.001 |

COR = unadjusted odds ratios, CI = confidence intervals.

AOR = odds ratios adjusted for all independent variables.

# BMJ Open

## Prevalence of anxiety and depressive symptoms and its association with multimorbidity and demographic factors: A community based cross sectional survey

|                                 |                                                                                                                                                                                                                                                                                                                                                      |
|---------------------------------|------------------------------------------------------------------------------------------------------------------------------------------------------------------------------------------------------------------------------------------------------------------------------------------------------------------------------------------------------|
| Journal:                        | <i>BMJ Open</i>                                                                                                                                                                                                                                                                                                                                      |
| Manuscript ID                   | bmjopen-2019-029315.R1                                                                                                                                                                                                                                                                                                                               |
| Article Type:                   | Original research                                                                                                                                                                                                                                                                                                                                    |
| Date Submitted by the Author:   | 17-Jun-2019                                                                                                                                                                                                                                                                                                                                          |
| Complete List of Authors:       | Farooq, Salima; Aga Khan University Faculty of Health Sciences, Institute of Nursing<br>Khan, Tahir; School of Public Health,<br>Zaheer, Sidra; Dow University of Health Sciences, School of Public Health<br>Shafique, Kashif; Dow University of Health Sciences, School of Public Health; University of Glasgow, Institute of Health and Wellbeing |
| <b>Primary Subject Heading</b>: | Epidemiology                                                                                                                                                                                                                                                                                                                                         |
| Secondary Subject Heading:      | Public health, Epidemiology                                                                                                                                                                                                                                                                                                                          |
| Keywords:                       | Multi-morbidity, Anxiety and Depression, Adult health                                                                                                                                                                                                                                                                                                |
|                                 |                                                                                                                                                                                                                                                                                                                                                      |

SCHOLARONE™  
Manuscripts

# Prevalence of anxiety and depressive symptoms and its association with multimorbidity and demographic factors: A community based cross sectional survey

## Author Details

### 1. Salima Farooq

School of Nursing and Midwifery

Aga Khan University, Karachi

[salima.farooq@aku.edu](mailto:salima.farooq@aku.edu)

021-34865274

### 2. Muhammad Tahir Khan (Corresponding Author)

School of Public Health

Dow University of Health Science

[tahir.khan@duhs.edu.pk](mailto:tahir.khan@duhs.edu.pk)

+92 300 9257633

### 3. Sidra Zaheer

School of Public Health

Dow University of Health Science

[sidra.zaheer@duhs.edu.pk](mailto:sidra.zaheer@duhs.edu.pk)

### 4. Kashif Shafique

School of Public Health

Dow University of Health Science

[k.shafique@duhs.edu.pk](mailto:k.shafique@duhs.edu.pk)

Institute of Health and Wellbeing,

Public Health, University of Glasgow,

Glasgow, United Kingdom

[kashif.shafique@glasgow.ac.uk](mailto:kashif.shafique@glasgow.ac.uk)

## Details of manuscript:

**Total words count of manuscript excluding tables, references and abstract: 3286**

**Word count of abstract: 255**

**Number of tables: 03**

**Number of figures: Zero (0)**

## Abstract

### Objectives

This study aimed to estimate the prevalence of anxiety and depressive symptoms and its association with multimorbidity and demographic characteristic of adults aged 30 years and above in Karachi, Pakistan.

### Design

Observational cross-sectional study

### Study Setting and Participants

The study was carried out among a general population aged 30 years and above, residing in Gulshan-e-Iqbal town of Karachi, Pakistan. The study participants were recruited using the systematic random sampling approach based on inclusion criteria. The data from 2867 participants was analyzed.

### Main Outcome Measures

Primary outcome of the study was prevalence of anxiety and depressive symptoms measured via Aga Khan University Anxiety Depression Scale (AKUADS). And the secondary outcome of the study was the association of anxiety and depressive symptoms with multimorbidity as well as socio-demographic characteristics of the participants using binary logistic regression.

### Results

Out of 2867 individuals, 27.4% participants reported to have anxiety and depressive symptoms. The multivariate logistic regression model revealed that the presence of multimorbidity

1  
2  
3 (AOR=1.32, 95% CI: 1.11, 1.57), the female gender (AOR= 2.44, 95% CI: 2.04, 2.92), illiteracy  
4  
5 (AOR=1.58, 95% CI: 1.16, 2.16), number of children (AOR=0.75, 95% CI: 0.59,0.93) , and  
6  
7 visiting a faith healer (AOR=2.31, 95% CI: 1.84, 2.90) were the significant factors associated with  
8  
9 anxiety and depressive symptoms.  
10  
11

## 12 13 **Conclusion**

14  
15  
16 This study revealed a moderately high prevalence of anxiety and depressive symptoms  
17  
18 among adults aged 30 years and above in Karachi, Pakistan. The key variables associated with  
19  
20 anxiety and depressive symptoms include; multimorbidity, female gender, lower level of  
21  
22 education, number of children and visiting faith healers.  
23  
24  
25  
26  
27  
28

## 29 *Key words*

30  
31 Multimorbidity, anxiety and depression, adults,  
32  
33  
34  
35  
36  
37  
38  
39  
40  
41  
42  
43  
44  
45  
46  
47  
48  
49  
50  
51  
52  
53  
54  
55  
56  
57  
58  
59  
60

## Strengths and limitations of this study

- The study sample was a large, community-based, diverse ethnic and socioeconomic group of the population.
- A validated screening tool (AKUADS) assessed the presence of anxiety and depressive symptoms, which thus, enhanced the internal validity of the research.
- Inferences could not be drawn about causality of association due to the nature of the design.
- The study data was self-reported, hence, the results should be interpreted cautiously.



## Introduction

Mental illness, anxiety and depressive symptoms are major public health issues. Globally 14% people suffer from mental illness (1). More than three quarter of these populations were linked with low and middle income countries (2). Moreover, depression has been ranked as the fourth leading cause of disease burden (3). Also, it is predicted that by the year 2020, it will be the second leading cause of disability and death after cardio vascular disorders (3-6). The magnitude of anxiety and depression is on the rise among general population. However, individuals with chronic diseases are at even higher risk of developing anxiety and depressive symptoms (7-10).

Multimorbidity is the co-occurrence of two or more chronic diseases such as cancer, diabetes, hypertension, stroke, asthma, heart disease, arthritis or osteoporosis within an individual (5, 11, 12). Research studies suggest that one in four adults in developed countries have multimorbidity (13, 14). On the other hand, low and middle income countries are the home of 80% of chronic illnesses (15). Another study claim that 52% of populations between the ages of 21 and 84 years are suffering from multimorbidity (16). Whereas, a study conducted by Garin et al (17) in 2014 found a 67% burden of multimorbidity among elder Spanish females. Furthermore, developing countries such as Bangladesh has the prevalence of multimorbidity as 53.8% among older adults (11). However, the reported burden of multimorbidity is 22% in India, (18). Among Pakistani population aged 18 years and older, it was previously reported as 4.9% (19). Thus, the prevalence of multimorbidity varies from 4.9% to 67% between various countries (19-21). Reasons for variation in prevalence could be due to differences in multimorbidity definitions, number of chronic conditions included in studies, diagnostic criteria for medical conditions, as well as study's sample size and population characteristics. Literature suggests that the prevalence of multimorbidity increases with age (12, 22), and this burden is reported to be more common in

1  
2  
3 females. Additionally, individuals living in underprivileged areas are at a higher risk of developing  
4  
5 multimorbidity (23).  
6

7  
8 Health care providers often face challenges when dealing with clients who have  
9  
10 multimorbidity along with anxiety and depressive symptoms (24, 25). As multimorbidity  
11  
12 conditions such as diabetes, hypertension, stroke, asthma, arthritis and osteoporosis have  
13  
14 synergetic effect with anxiety and depression, it increases the probability of disabilities among  
15  
16 patients (7). The presence of anxiety and depression with multimorbidity leads to increased rates  
17  
18 of utilizing health care facilities. This consequently leads to financial health care burdens and  
19  
20 poorer health outcomes (2, 13, 26, 27). Individuals with multimorbidity need to deal with multiple  
21  
22 treatment recommendations (10). Thus, anxiety and depression with multimorbidity is linked with  
23  
24 50% to 100% of the utilization of health services and cost (28)  
25  
26  
27

28  
29 Anxiety and depression are extremely common and alarmingly underdiagnosed healthcare  
30  
31 problems, especially in low and middle income countries. In addition, it is associated with social  
32  
33 and self-stigma, which create barrier to mental help seeking behavior of individuals who suffer  
34  
35 from mental health issues that further leads to an even greater public health concern. Furthermore,  
36  
37 anxiety and depression are specifically reported to be common in individuals with multimorbidity  
38  
39 (7, 10). However, the studies that report these associations are mostly conducted in high income  
40  
41 countries. To the best of our knowledge, no such population based study has been reported from  
42  
43 Pakistan yet. In a resource limited setting like Pakistan, under diagnosis of mental illnesses can  
44  
45 cause potential delay in the initiation of treatment. Hence, it is of utmost importance that anxiety  
46  
47 and depression be screened in adults suffering from multimorbidity in order to reduce the burden  
48  
49 of complications and suboptimal adherence to the treatment of multimorbidity conditions.  
50  
51 Therefore, scarcity of literature from Pakistan requires quantification of the association between  
52  
53  
54  
55  
56  
57  
58  
59  
60

1  
2  
3 anxiety and depression with multimorbidity within the Pakistani population. It was hypothesized  
4 that there is an association between anxiety and depressive symptoms and multimorbidity among  
5 Pakistani population. Therefore, the purpose of this study was to estimate the prevalence of anxiety  
6 and depressive symptoms, and determine the association with multimorbidity and demographic  
7 factors among adults aged 30 years and above in Karachi, Pakistan.  
8  
9  
10  
11  
12  
13  
14  
15  
16  
17  
18  
19  
20  
21  
22  
23  
24  
25  
26  
27  
28  
29  
30  
31  
32  
33  
34  
35  
36  
37  
38  
39  
40  
41  
42  
43  
44  
45  
46  
47  
48  
49  
50  
51  
52  
53  
54  
55  
56  
57  
58  
59  
60

For peer review only

## Methodology

This study was a part of a larger community based research project titled “The Burden of Multimorbidity, Its Patterns and Consequences on Health and Well-Being: The IMPACT Study”, conducted in 2015-2016.

**Study design:** Cross-sectional study was conducted to estimate the burden of anxiety and depressive symptoms, and to identify their associated factors.

**Study population:** The study population comprised of all adults of age 30 years and above, and residents of Gulshan-e-Iqbal town, Karachi, Pakistan. This particular age group was selected for this study as chronic medical conditions are more prevalent among them.

**Inclusion criteria:** All Participants who were aged 30 years and above and who were the residents of Gulshan-e-Iqbal town, Karachi Pakistan and signed the consent form to take part in the study.

**Sample size calculation:** For the objective of this study, the sample size was calculated using an online version of Open Epi calculator. The prevalence of anxiety and depression is reported to be 30% to 50% among adults in Pakistan (29, 30). With 2% margin of error and 95% confidence level, the required sample size was 2401 participants. Similarly, for secondary objective (association of anxiety and depressive symptoms with multimorbidity), keeping the confidence interval of 95%, 90% power, 1:1 ratio of non-depressed and depressed individuals with odds ratio of 1.55, and proportion of multimorbidity among non-depressed was taken as 10% (Smith et al., 2014), the required sample size was 2148 individuals. In order to account for missing values, a higher sample size (2401) was chosen. However, we have taken 3250 individuals for data collection.

1  
2  
3 **Sampling Technique:** The present study was conducted in Gulshan-e-Iqbal town of Karachi,  
4 Pakistan. A sample of 3250 participants was recruited by using systematic random sampling. This  
5 required sample was achieved by using proportionate estimates of the number of individuals in 13  
6 Union Councils (UCs) in the selected town. A Proportionate allocation method was used in order  
7 to allocate appropriate weightage to each UC. Within each UC, blocks of houses were selected  
8 with a random start, where every 109<sup>th</sup> (k<sup>th</sup> sampling interval) household was selected. Individuals  
9 within these households who met the eligibility criteria were included in the study.  
10  
11  
12  
13  
14  
15  
16  
17  
18  
19

20 **Data Collection:** Data were collected from participants by interviewing them with the help of  
21 structured questionnaire. The questionnaire was developed after thorough literature review to  
22 collect data about socio demographic information (including age, gender, marital status,  
23 educational status, employment status, mother tongue, number of family members and information  
24 about housing, presence of any chronic disease, and living condition of each participant.  
25 Participants were interviewed by trained data collectors, the anthropometric measurements as well  
26 as Blood Pressure were measured by trained health professionals mainly included doctors and  
27 nurses who were involved in data collection.  
28  
29  
30  
31  
32  
33  
34  
35  
36  
37  
38  
39  
40  
41

42 **Dependent variable:** The Aga Khan University Anxiety Depression Scale (AKUADS) was used  
43 to assess anxiety and depressive symptoms of the participants. This tool has a total of 25 questions  
44 and for each of the questions the participant can choose an answer from Never (scored as 0),  
45 Sometime (scored as 1), Often (scored as 2), Always (scored as 3). The cumulative cutoff score of  
46 20 or greater at this scale is used to label anxiety and depression. At cutoff score of 20, the  
47 AKUADS had a sensitivity of 66% and a specificity of 79% (31, 32). This study used the Urdu  
48 version of the AKUADS which had been validated in a previous research (31). The value of the  
49  
50  
51  
52  
53  
54  
55  
56  
57  
58  
59  
60

1  
2  
3 reliability coefficient tool in our study's population was 0.93. **Independent Variables:** The  
4 presence of disease was assessed by a combination of self-reported diagnosis, medication use, and  
5 laboratory findings. Self-reported disease was determined by the question: "Have you ever been  
6 told by a doctor, nurse, or other health professional that you have hypertension, dyslipidemia,  
7 diabetes, heart diseases (Myocardial Infarction and/or chronic ischemic heart diseases), stroke,  
8 migraines, asthma and COPD, anemia, thyroid disease, diseases of bones and joints,  
9 dyspepsia/peptic ulcer, hepatitis B and C, chronic kidney diseases including stones, cancer, and/or  
10 disability?". The following criteria were used to define chronic diseases such as hypertension,  
11 obesity, diabetes, and dyspepsia.  
12  
13  
14  
15  
16  
17  
18  
19  
20  
21  
22  
23

24 A person was said to be hypertensive if that person had a high systolic BP (>140 mm Hg) or a high  
25 diastolic BP (>90 mm Hg). A person is said to be obese if they had a calculated BMI  $\geq 30.0$  kg/m<sup>2</sup>.  
26  
27  
28

29 A person was said to be diabetic if his blood glucose level was  $\geq 200$  mg/dl. A person was  
30 considered having dyspepsia if they had four or more symptoms of dyspepsia for at least 6 months,  
31 based on the Leeds Dyspepsia Questionnaire (LDQ).  
32  
33  
34  
35

36 Individuals with 2 or more chronic diseases (excluding anxiety and depression) were labeled as  
37 having 'multimorbidity' and others who reported one or no chronic medical disease were  
38 considered as having 'no multimorbidity'.  
39  
40  
41  
42

43 Beside disease related variables, other sociodemographic variables were also measured such as  
44 household income, occupation and education. This variable was initially taken as continuous  
45 variable such as what is your monthly income (in Pakistani Rupees). Then it was further classified  
46 into quintiles i.e. < 16000, 16001-24999, 25000-39999, 40000-54999 and 55000 rupees and above.  
47  
48  
49  
50  
51

52 Occupation of all participants was also assessed as a categorical variable and had following  
53 categories such as unemployed, unskilled worker, skilled worker, labor worker, non-manual  
54  
55  
56  
57  
58  
59  
60

1  
2  
3 worker and professional office job. Data on education were collected as total number of years of  
4 full education, which was then categorized into five categories as follows:  
5  
6  
7

- 8 a. No education (0 years or those who never attended school)
- 9
- 10 b. Primary (1-5 years)
- 11
- 12 c. Secondary (6-10 years)
- 13
- 14
- 15 d. Higher education (11-14 years)
- 16
- 17
- 18 e. Postgraduate ( $\geq 15$  years)
- 19
- 20
- 21
- 22
- 23
- 24
- 25

26 **Ethical considerations:** The study's proposal was approved by The Institutional Review Board  
27 (IRB) of Dow University Health Sciences, reference number: Ref: IRB-  
28 554/DUHS/Approval/2015/04. Individuals who provided written informed consent were  
29 interviewed. A referral plan for counseling was made for participants who scored 20 and above on  
30 the AKUADS scale.  
31  
32  
33  
34  
35  
36  
37  
38  
39

40 **Statistical Analysis:** Variables were pre-coded and data was entered and analyzed in the SPSS  
41 version 19.0. Descriptive statistics were calculated in the form of frequencies and percentages for  
42 categorical variables. Descriptive statistics were calculated in order to estimate the prevalence of  
43 anxiety and depressive symptoms. Univariate and multivariate binary logistics regressions were  
44 used to assess the associations between anxiety and depressive symptoms and multimorbidity and  
45 odd ratios and their 95% confidence intervals were also calculated. The multivariate model was  
46 adjusted for only variables with p-values  $< 0.250$  in univariate analysis using a step-wise logistic  
47  
48  
49  
50  
51  
52  
53  
54  
55  
56  
57  
58  
59  
60

1  
2  
3 regression method. This manuscript has followed STROBE cross sectional reporting guidelines  
4  
5 (33).  
6

7  
8 **Patient and public involvement:** In current study patient and participants were not involved in  
9  
10 the research question, study design, outcome measure and recruitment.  
11  
12

13  
14  
15  
16 **Data availability statement:** The data is available on request from the corresponding author.  
17  
18  
19  
20  
21  
22  
23  
24  
25  
26  
27  
28  
29  
30  
31  
32  
33  
34  
35  
36  
37  
38  
39  
40  
41  
42  
43  
44  
45  
46  
47  
48  
49  
50  
51  
52  
53  
54  
55  
56  
57  
58  
59  
60



## Results

A total of 3250 participants were interviewed. However, the data were analyzed using information from 2867 study participants. Of the total, 383 participants were excluded due to missing information on the variables: anxiety & depression symptoms (n=06), presence of multimorbidity (n=09), respondent age (n=06), gender (n=08), education (n=48), income (n=81), occupation (n=72), marital status (n=05), number of children (n=67), ethnicity (n=09), home status (n=14), smoking status (n=66), and visiting faith healer (n=93).

Out of 2867 study participants, the mean age was 45.5 years (SD  $\pm$ 11.7 years). In the study, there was an approximately equal ratio of male 51.5 % (n=1477) to female 48.5% (n=1390). Regarding educational level of the participants, 14% (n=404) had no formal education, 38.3% (n=1098) had higher education, and 20.4% (n=585) had postgraduate education. In addition, 22.3% (n=638) reported their monthly household income to be less than 16,000 rupees while 18.2% (n=523) claimed their monthly income to be more than 55,000 rupees. Majority of participants 42% (n=1205) had professional jobs, 14% (n=389) were labor, and 17% (n=484) participants were unemployed. In our study, participants reported anxiety and depressive symptoms and multimorbidity to be 27.4% (n=786) and 50.2% (n=1440), respectively. The socio-demographic and other characteristics of the participants are shown in Table 1.

Adjusted model revealed that, participants who had multimorbidity had a 32% increased odds of being anxious and depressed (AOR=1.32, 95% CI: 1.11, 1.57) as compared to those who reported no multimorbidity. The odds of having anxiety and depressive symptoms were 2.44 times higher among females as compared to male participants (AOR= 2.44, 95% CI:2.04, 2.92). The odds of having anxiety and depressive symptoms were 58% higher among participants who had no formal education (AOR=1.58, 95% CI: 1.16, 2.16), as compared to participants who had

1  
2  
3 postgraduate education. The odds of being anxious and depressed were 1.35 times higher among  
4  
5 participants who were labor workers as compared to participants who were doing professional  
6  
7 office jobs (AOR=1.35, 95% CI: 1.01, 1.79). Study participants who had 1 to 2 children were 32%  
8  
9 less likely (AOR=0.68, 95% CI: 0.56, 0.84), and who had more than two children were 25% less  
10  
11 likely (AOR=0.75, 95% CI: 0.59, 0.93) to had anxiety and depressive symptoms as compared to  
12  
13 participants who had no children. In addition, subjects who were visiting a faith healer were 2.31  
14  
15 times (AOR=2.31, 95% CI: 1.84, 2.9) odds of exhibiting anxiety and depressive symptoms as  
16  
17 compared to participants who did not visit a faith healer (Table 2).  
18  
19  
20  
21

22  
23 Table 3 showed the estimated association of anxiety and depressive symptoms and number  
24  
25 of chronic diseases. The anxiety and depressive symptoms were significantly associated with  
26  
27 increasing number of chronic diseases. The odds of anxiety and depressive symptoms were highest  
28  
29 among individuals with four chronic diseases (AOR=1.92, 95% CI: 1.33, 2.78), and more than  
30  
31 four chronic diseases (AOR=2.62, 95% CI: 1.66, 4.13), compared with healthy individuals when  
32  
33 adjusted for other variables (Table 3).  
34  
35  
36  
37  
38  
39  
40  
41  
42  
43  
44  
45  
46  
47  
48  
49  
50  
51  
52  
53  
54  
55  
56  
57  
58  
59  
60

## Discussion

This study showed that nearly one fourth of the adult population in Karachi have symptoms of anxiety and depression. This study illustrated that presence of multimorbidity, female gender, lower level of education, number of children and visiting a faith healer were significantly associated with anxiety and depressive symptoms.

Current study used a screening tool (AKUADS) to assess the presence of anxiety and depressive symptoms. In the present study, an overall prevalence of anxiety and depressive symptoms was 27.4%. The prevalence of anxiety and depression was previously reported to be around 10% and 44% in developed and developing countries, respectively (34, 35). Islam et al in their study conducted in 2003 (36), found a 28% prevalence of depression among the Bangladesh population. In the United States, the prevalence of anxiety and depression was reported to be 16.2% (37). Papadopoulos et al. (38) reported that the prevalence of depression in Greece was 27%. Whereas, in India, the prevalence of depression was found to be 28% (39). However, in Pakistan, the prevalence of depression and anxiety found to be around 30 to 50 %. (29, 34, 35, 40). A plausible reason of the difference in prevalence of anxiety and depression could be due to the inclusion criteria, sample sizes, recruitment methods, various screening tools, as well as different cutoff points that were employed in these diverse studies (21).

In the past decade, several research studies have established a strong relationship between anxiety and depression and multimorbidity (5, 8, 10, 41). Moving on, our findings were in concurrence with previous studies, showing a significant association between anxiety and depression and multimorbidity.(5, 10, 42-45). A probable reason could be that mental illness is linked with an unhealthy habits such as the use of smoking, poor self-care, lack of physical activities, and poor medication compliance (43, 46).

1  
2  
3 In the present study, anxiety and depressive symptoms were found to be strongly associated  
4 with females. The prevalence of anxiety and depressive symptoms were found to be 2.5 times  
5 higher in females, rather than males. Likewise, previous studies have also revealed a positive  
6 association between anxiety, depression, and gender. A research conducted by Mirza and Jenkin  
7 (40) found that the prevalence of anxiety and depressive symptoms were 29-66% among females  
8 as compared to males, which was 10-33%. A plausible reason for higher prevalence of anxiety  
9 and depression among women could be due to biological factors, socio-economical disadvantages,  
10 deprivation of social status, maladaptive coping styles, and lack of a support system for females  
11 in our country (47).  
12  
13  
14  
15  
16  
17  
18  
19  
20  
21  
22  
23  
24

25 The current study also found illiteracy as one of the potential risk factors among  
26 participants. Similarly, previous studies found a strong association between low levels of education  
27 and anxiety and depressive symptoms (48, 49). Whereas, among the literate population, education  
28 could be one of the reasons that facilitates their adaptive coping skills to deal with distress situation  
29 and improving self-confidence, self-efficacy, social skills building and sense of control over  
30 environment (50).  
31  
32  
33  
34  
35  
36  
37  
38

39 In our study, participants who bore more children were less likely to develop anxiety and  
40 depressive symptoms. The plausible reason could be that parents tend to positively engage and  
41 bind to their children's lives by giving continuous love, time, support and commitment, which can  
42 all be coping strategies against distress. In contrast, other studies found that having more children  
43 is a risk factor for anxiety and depression among women (48, 51). This could be due to the extra  
44 burden of responsibilities that woman has to fulfill in our society; whereas, as per societal norms,  
45 males are not expected to take part in household chores and traditional child care.  
46  
47  
48  
49  
50  
51  
52  
53  
54  
55  
56  
57  
58  
59  
60

1  
2  
3 A notable finding of our study was that visiting a faith healer was positively associated  
4 with anxiety and depression among both genders. In our culture, distressed individuals seek help  
5 from traditional healers or faith healers prior to visiting a doctor or psychiatrist for their illness. .  
6  
7 However, a few probable reasons for visiting faith healers could be due to easy accessibility,  
8 availability and affordability , cultural beliefs and the predominant stigma attached to the notion  
9 of mental illness (51, 52). Moreover, in our culture many people believe that mental illnesses are  
10 due to wrongdoings, being possessed, witchcraft and spirit; hence the affected population consults  
11 with these faith healers rather than doctors. Our result is consistent with a past study, where it was  
12 reported that sixteen percent of the Pakistani population first approach to faith healer for their  
13 illness (53). Therefore, there is a dire need to create awareness regarding identification of  
14 symptoms of mental illness and to develop proper referral system for essential treatment on early  
15 stage of disease to avoid delayed presentation with more advanced disease.  
16  
17  
18  
19  
20  
21  
22  
23  
24  
25  
26  
27  
28  
29  
30  
31  
32  
33  
34

## 35 **Strengths and Limitations**

36  
37 This is the first research that determined an association of anxiety and depressive  
38 symptoms with multimorbidity among the population in Pakistan. Inferences could not be  
39 determined about the causality of the relationship due to cross-sectional nature of study. Potential  
40 risk factors such as, family history of psychiatric disorders, marital dissatisfaction, domestic  
41 violence, maladaptive coping, current life stressors, and death of a loved one that could not be  
42 addressed in the current study. This study was based on self-reported information on  
43 multimorbidity and anxiety and depression.  
44  
45  
46  
47  
48  
49  
50  
51  
52  
53  
54  
55  
56  
57  
58  
59  
60

## Conclusion

This study suggests that almost one quarter of the population had anxiety and depressive symptoms. Among females, anxiety and depressive symptoms are twice as common, as compared to males. Early prevention and screenings are key measures to prevent the rising burden of mental disorders when dealing with chronic physical conditions.

## Author Contributions

KS, SF conceived the research question and design of this project. SF conducted all the literature reviews and manuscript drafting and reviewing as well as took part in data collection. MTK and SZ helped in the data analysis, preparation of tables, and reviewed the manuscript. KS supervised the research project and conducted the final editing and review of the manuscript. The final version of manuscript was seen and approved by all contributors.

## Conflicts of Interest

None

## Data Statement

## Funding

None

## Acknowledgement

1  
2  
3  
4  
5  
6  
7  
8  
9  
10  
11  
12  
13  
14  
15  
16  
17  
18  
19  
20  
21  
22  
23  
24  
25  
26  
27  
28  
29  
30  
31  
32  
33  
34  
35  
36  
37  
38  
39  
40  
41  
42  
43  
44  
45  
46  
47  
48  
49  
50  
51  
52  
53  
54  
55  
56  
57  
58  
59  
60

We would like to acknowledge the contributions of Ms. Yasmin Parpio and Ms.Ambreen Gowani  
in this research work.

For peer review only

## References

1. Yatham S, Sivathasan S, Yoon R, da Silva TL, Ravindran AV. Depression, anxiety, and post-traumatic stress disorder among youth in low and middle income countries: a review of prevalence and treatment interventions. *Asian J Psychiatr*. 2018;38:78-91.
2. Jordans MJ, Kaufman A, Brenman NF, Adhikari RP, Luitel NP, Tol WA, et al. Suicide in South Asia: a scoping review. *BMC psychiatry*. 2014;14(1):358.
3. Moussavi S, Chatterji S, Verdes E, Tandon A, Patel V, Ustun B. Depression, chronic disease and decrements in health: Evidence from the World Health Surveys. *Lancet*. 2007;369:851-8.
4. Mathers C, Fat DM, Boerma JT. The global burden of disease: 2004 update: World Health Organization; 2008.
5. O'Connor K, Vizcaino M, Ibarra JM, Balcazar H, Perez E, Flores L, et al. Multimorbidity in a Mexican Community: Secondary Analysis of Chronic Illness and Depression Outcomes. *Int J Nurs*. 2015;2(1):35.
6. WHO. Depression and other common mental disorders: global health estimates. 2017.
7. Deschênes SS, Burns RJ, Schmitz N. Associations between depression, chronic physical health conditions, and disability in a community sample: A focus on the persistence of depression. *J Affect Disord*. 2015;179:6-13.
8. Winkler P, Horáček J, Weisssová A, Šustr M, Brunovský M. Physical Comorbidities in Depression Co-Occurring with Anxiety: A Cross Sectional Study in the Czech Primary Care System. *Int J Environ Res Public Health*. 2015;12(12):15728-38.
9. Levinson D, Karger CJ, Haklai Z. Chronic physical conditions and use of health services among persons with mental disorders—results from the Israel National Health Survey. *Gen Hosp Psychiatry*. 2008;30(3):226-32.
10. Gunn JM, Ayton DR, Densley K, Pallant JF, Chondros P, Herrman HE, et al. The association between chronic illness, multimorbidity and depressive symptoms in an Australian primary care cohort. *Soc Psychiatry Psychiatr Epidemiol*. 2012;47(2):175-84.
11. Khanam MA, Streatfield PK, Kabir ZN, Qiu C, Cornelius C, Wahlin Å. Prevalence and patterns of multimorbidity among elderly people in rural Bangladesh: a cross-sectional study. *J Health Popul Nutr*. 2011;29(4):406.
12. Liddy C, Blazkho V, Mill K. Challenges of self-management when living with multiple chronic conditions Systematic review of the qualitative literature. *Can Fam Physician*. 2014;60(12):1123-33.
13. Ahmadi B, Alimohammadian M, Yaseri M, Majidi A, Boreiri M, Islami F, et al. Multimorbidity: Epidemiology and Risk Factors in the Golestan Cohort Study, Iran: A Cross-Sectional Analysis. *Medicine*. 2016;95(7):e2756.
14. Alaba O, Chola L. The social determinants of multimorbidity in South Africa. *Int J Equity Health*. 2013;12(1):1-10.
15. Chatterji S, Byles J, Cutler D, Seeman T, Verdes E. Health, functioning, and disability in older adults—present status and future implications. *Lancet*. 2015;385(9967):563-75.
16. Aarts S, van den Akker M, Bosma H, Tan F, Verhey F, Metsemakers J, et al. The effect of multimorbidity on health related functioning: Temporary or persistent? Results from a longitudinal cohort study. *J Psychosom Res*. 2012;73(3):211-7.
17. Garin N, Olaya B, Perales J, Moneta MV, Miret M, Ayuso-Mateos JL, et al. Multimorbidity patterns in a national representative sample of the Spanish adult population. *PloS one*. 2014;9(1).
18. Akinsulore A, Esimai OA, Afolabi OT, Aloba OO, Mapayi BM. Prevalence and factors associated with depressive symptoms among Yoruba adults in a semi-urban community in South-Western Nigeria. *J Behav Health*. 2015;4(3):81-6.



19. Afshar S, Roderick PJ, Kowal P, Dimitrov BD, Hill AG. Multimorbidity and the inequalities of global ageing: a cross-sectional study of 28 countries using the World Health Surveys. *BMC public health*. 2015;15(1):1.
20. Roberts K, Rao D, Bennett T, Loukine L, Jayaraman G. Prevalence and patterns of chronic disease multimorbidity and associated determinants in Canada. *Health Promotion*. 2015;35(6):87-94.
21. Taylor AW, Price K, Gill TK, Adams R, Pilkington R, Carrangis N, et al. Multimorbidity-not just an older person's issue. Results from an Australian biomedical study. *BMC public health*. 2010;10(1):1.
22. Marengoni A, Angleman S, Melis R, Mangialasche F, Karp A, Garmen A, et al. Aging with multimorbidity: a systematic review of the literature. *Ageing Res Rev*. 2011;10(4):430-9.
23. Orueta JF, Nuño-Solinís R, García-Alvarez A, Alonso-Morán E. Prevalence of multimorbidity according to the deprivation level among the elderly in the Basque Country. *BMC public health*. 2013;13(1):918.
24. Roca M, Gili M, Garcia-Garcia M, Salva J, Vives M, Campayo JG, et al. Prevalence and comorbidity of common mental disorders in primary care. *J Affect Disord*. 2009;119(1):52-8.
25. Naqvi H, Khan MM. Depression in primary care: difficulties and paradoxes. *JPMA* 2005;55(9):393.
26. Uijen AA, van de Lisdonk EH. Multimorbidity in primary care: prevalence and trend over the last 20 years. *Eur J Gen Pract*. 2008;14(sup1):28-32.
27. Lockett H, Lai J, Tuason C, Jury A, Fergusson D. Primary healthcare utilisation among adults with mood and anxiety disorders: an analysis of the New Zealand Health Survey. *J Prim Health Care*. 2018;10(1):68-75.
28. Simon GE, VonKorff M, Barlow W. Health care costs of primary care patients with recognized depression. *Arch Gen Psychiatry*. 1995;52(10):850-6.
29. Ali B, Amanullah S. Prevalence of anxiety and depression in an urban squatter settlement of Karachi. *J Coll Physicians Surg Pak*. 2000;10(1):4-6.
30. Waheed A, Hameed K, Khan AM, Syed J, Mirza AI. The burden of anxiety and depression among patients with chronic rheumatologic disorders at a tertiary care hospital clinic in Karachi, Pakistan. *JPMA*. 2006;56(5):243-7.
31. Ali BS. Validation of an indigenous screening questionnaire for anxiety and depression in an urban squatter settlement of Karachi. *J Coll Physicians Surg Pak*. 1998;8:207-11.
32. Ali BS, Reza H. Development of an indigenous screening instrument in Pakistan: the Aga Khan University Anxiety and Depression Scale. *JPMA* 1998;48:261-5.
33. Von Elm E, Altman DG, Egger M, Pocock SJ, Gøtzsche PC, Vandenbroucke JP, et al. The Strengthening the Reporting of Observational Studies in Epidemiology (STROBE) statement: guidelines for reporting observational studies. *PLoS Med*. 2007;4(10):e296.
34. Luni FK, Ansari B, Jawad A, Dawson A, Baig SM. Prevalence of depression and anxiety in a village in Sindh. *J Ayub Med Coll Abbottabad*. 2009;21(2):68-72.
35. Muhammad Gadit AA, Mugford G. Prevalence of depression among households in three capital cities of Pakistan: need to revise the mental health policy. *Plos one*. 2007;2(2):e209.
36. Islam MM, Ali M, Ferroni P, Underwood P, Alam MF. Prevalence of psychiatric disorders in an urban community in Bangladesh. *Gen Hosp Psychiatry*. 2003;25(5):353-7.
37. Kessler RC, Berglund P, Demler O, Jin R, Koretz D, Merikangas KR, et al. The epidemiology of major depressive disorder: results from the National Comorbidity Survey Replication (NCS-R). *JAMA*. 2003;289(23):3095-105.
38. Papadopoulos F, Petridou E, Argyropoulou S, Kontaxakis V, Dessypris N, Anastasiou A, et al. Prevalence and correlates of depression in late life: a population based study from a rural Greek town. *Int J Geriatr Psychiatry*. 2005;20(4):350-7.

- 1
- 2
- 3
- 4 39. Patel V, Prince M. Ageing and mental health in a developing country: who cares? Qualitative
- 5 studies from Goa, India. *Psychol Med*. 2001;31(01):29-38.
- 6 40. Mirza I, Jenkins R. Risk factors, prevalence, and treatment of anxiety and depressive disorders in
- 7 Pakistan: systematic review. *BMJ*. 2004;328(7443):794.
- 8 41. Smith DJ, McLean G, Martin D, Langan MJ, Guthrie B, Gunn J, et al. Depression and
- 9 multimorbidity: a cross-sectional study of 1,751,841 patients in primary care. *J Clin Psychiatry*.
- 10 2014;75(11):1202-8.
- 11 42. Patten SB. Long-term medical conditions and major depression in a Canadian population study
- 12 at waves 1 and 2. *J Affect Disord*. 2001;63(1):35-41.
- 13 43. Patten SB. An analysis of data from two general health surveys found that increased incidence
- 14 and duration contributed to elevated prevalence of major depression in persons with chronic medical
- 15 conditions. *J Clin Epidemiol*. 2005;58(2):184-9.
- 16 44. Patten SB, Wang JL, Williams JV, Currie S. Descriptive epidemiology of major depression in
- 17 Canada. *Can J Psychiatry*. 2006;51(2):84.
- 18 45. Spangenberg L, Forkmann T, Braehler E, Glaesmer H. The association of depression and
- 19 multimorbidity in the elderly: implications for the assessment of depression. *Psychogeriatrics*.
- 20 2011;11(4):227-34.
- 21 46. Katon WJ. Clinical and health services relationships between major depression, depressive
- 22 symptoms, and general medical illness. *Biol Psychiatry*. 2003;54(3):216-26.
- 23 47. Zahidie A, Jamali T. An overview of the predictors of depression among adult Pakistani women. *J*
- 24 *Coll Physicians Surg Pak*. 2013;23(8):574.
- 25 48. Husain N, Creed F, Tomenson B. Depression and social stress in Pakistan. *Psychol Med*.
- 26 2000;30(02):395-402.
- 27 49. Lovisi GM, Lopez J, Coutinho ESF, Patel V. Poverty, violence and depression during pregnancy: a
- 28 survey of mothers attending a public hospital in Brazil. *Psychol Med*. 2005;35(10):1485-92.
- 29 50. Harpham T. Urbanization and mental health in developing countries: a research role for social
- 30 scientists, public health professionals and social psychiatrists. *Soc Sci Med*. 1994;39(2):233-45.
- 31 51. Nisar N, Billoo N, Gadit A. Prevalence of depression and the associated risks factors among adult
- 32 women in a fishing community. *JPMA*. 2004;54(10):519-25.
- 33 52. Mishra N, Nagpal SS, Chadda RK, Sood M. Help-seeking behavior of patients with mental health
- 34 problems visiting a tertiary care center in north India. *Indian J Psychiatry*. 2011;53(3):234.
- 35 53. Mubbashar M, Saeed K. Development of mental health services in Pakistan. *East Mediterr*
- 36 *Health J*. 2001;7:392-6.
- 37
- 38
- 39
- 40
- 41
- 42
- 43
- 44
- 45
- 46
- 47
- 48
- 49
- 50
- 51
- 52
- 53
- 54
- 55
- 56
- 57
- 58
- 59
- 60

**Table 1: Socio-demographic and other characteristics of participants (n=2867)**

| Characteristics                        | n (%)       |
|----------------------------------------|-------------|
| <b>Anxiety and depressive symptoms</b> |             |
| No                                     | 2081 (72.6) |
| Yes                                    | 786 (27.4)  |
| <b>Presence of multimorbidity</b>      |             |
| No                                     | 1427 (49.8) |
| Yes                                    | 1440 (50.2) |
| <b>Age</b>                             |             |
| 30-39 years                            | 1062 (37.0) |
| 40-49 years                            | 816 (28.5)  |
| 50-59 years                            | 570 (19.9)  |
| 60-69 years                            | 293 (10.2)  |
| ≥70 years                              | 126 (4.4)   |
| <b>Gender</b>                          |             |
| Male                                   | 1477 (51.5) |
| Female                                 | 1390 (48.5) |
| <b>Education</b>                       |             |
| No education                           | 404 (14.1)  |
| Primary                                | 133 (4.6)   |
| Secondary                              | 647 (22.6)  |
| Higher/Graduation                      | 1098 (38.3) |
| Post-graduate                          | 585 (20.4)  |
| <b>Income</b>                          |             |
| <16,000                                | 638 (22.3)  |
| 16,001-24,999                          | 426 (14.9)  |
| 25,000-39,999                          | 636 (22.2)  |
| 40,000-54,999                          | 644 (22.5)  |
| >55,000                                | 523 (18.2)  |
| <b>Occupation</b>                      |             |
| Unemployed                             | 484 (16.9)  |
| Unskilled worker                       | 243 (8.5)   |
| Skilled worker                         | 250 (8.7)   |
| Labor work                             | 389 (13.6)  |
| Non-manual work                        | 296 (10.3)  |
| Professional office job                | 1205 (42)   |
| <b>Marital status</b>                  |             |

|                              |             |
|------------------------------|-------------|
| Never Married                | 272 (9.5)   |
| Currently Married            | 2437 (85.0) |
| Widowed/Separated/Divorced   | 158 (5.5)   |
| <b>Numbers of Children</b>   |             |
| No child                     | 1250 (43.6) |
| 1-2 children                 | 974 (34.0)  |
| 3 and above children         | 643 (22.4)  |
| <b>Ethnicity</b>             |             |
| Sindhi                       | 402 (14.0)  |
| Punjabi                      | 318 (11.1)  |
| Balochi                      | 94 (3.3)    |
| Pashtu                       | 176 (6.1)   |
| Urdu                         | 1534 (53.5) |
| Others                       | 343 (12.0)  |
| <b>Home Status</b>           |             |
| Own                          | 1595 (55.6) |
| Rent                         | 1155 (40.3) |
| Other Arrangement            | 117 (4.1)   |
| <b>Smoking Status</b>        |             |
| No                           | 2323 (81.0) |
| Yes                          | 544 (19.0)  |
| <b>Visiting Faith Healer</b> |             |
| No                           | 2471 (86.2) |
| Yes                          | 396 (13.8)  |

**Table 2: Univariate and multivariate analysis of factors associated with anxiety & depressive symptoms among adults (n=2867)**

| Characteristics                   | Anxiety and depressive symptoms |           |      |           |
|-----------------------------------|---------------------------------|-----------|------|-----------|
|                                   | COR                             | 95% CI    | AOR  | 95% CI    |
| <b>Presence of multimorbidity</b> |                                 |           |      |           |
| No                                | 1                               |           | 1    |           |
| Yes                               | 1.39                            | 1.18,1.64 | 1.32 | 1.11,1.57 |
| <b>Age</b>                        |                                 |           |      |           |
| 30-39 years                       | 1                               |           | -    |           |
| 40-49 years                       | 0.95                            | 0.77,1.77 | -    |           |
| 50-59 years                       | 1.14                            | 0.92,1.40 | -    |           |
| 60-69 years                       | 1.02                            | 0.78,1.40 | -    |           |
| ≥70 years                         | 1.26                            | 0.85,1.88 | -    |           |
| <b>Gender</b>                     |                                 |           |      |           |
| Male                              | 1                               |           | 1    |           |
| Female                            | 2.58                            | 2.17,3.05 | 2.44 | 2.04,2.92 |
| <b>Education</b>                  |                                 |           |      |           |

|    |                              |      |           |      |           |
|----|------------------------------|------|-----------|------|-----------|
| 1  |                              |      |           |      |           |
| 2  |                              |      |           |      |           |
| 3  | Post-graduate                | 1    |           | 1    |           |
| 4  | Higher/Graduation            | 0.89 | 0.71,1.13 | 0.88 | 0.69,1.13 |
| 5  | Secondary                    | 1.15 | 0.89,1.48 | 1.08 | 0.81,1.44 |
| 6  | Primary                      | 1.22 | 0.81,1.85 | 1.12 | 0.71,1.78 |
| 7  | No education                 | 1.95 | 1.48,2.57 | 1.58 | 1.16,2.16 |
| 8  |                              |      |           |      |           |
| 9  |                              |      |           |      |           |
| 10 | <b>Income</b>                |      |           |      |           |
| 11 | >55,000                      | 1    |           | -    |           |
| 12 | 40,000-54,999                | 0.91 | 0.69,1.17 | -    |           |
| 13 | 25,000-39,999                | 0.99 | 0.76,1.28 | -    |           |
| 14 | 16,001-24,999                | 1.08 | 0.81,1.43 | -    |           |
| 15 | <16,000                      | 1.02 | 0.79,1.32 | -    |           |
| 16 |                              |      |           |      |           |
| 17 | <b>Occupation</b>            |      |           |      |           |
| 18 | Professional office job      | 1    |           | 1    |           |
| 19 | Non-manual work              | 0.78 | 0.58,1.06 | 0.82 | 0.58,1.13 |
| 20 | Labor work                   | 1.22 | 0.95,1.57 | 1.35 | 1.01,1.79 |
| 21 | Skilled worker               | 1.15 | 0.85,1.55 | 1.29 | 0.93,1.78 |
| 22 | Unskilled worker             | 1.17 | 0.87,1.59 | 1.06 | 0.75,1.48 |
| 23 | Unemployed                   | 0.85 | 0.71,1.14 | 0.90 | 0.68,1.18 |
| 24 |                              |      |           |      |           |
| 25 |                              |      |           |      |           |
| 26 | <b>Marital status</b>        |      |           |      |           |
| 27 | Never Married                | 1    |           | -    |           |
| 28 | Currently Married            | 1.27 | 0.94,1.72 | -    |           |
| 29 | Widowed/separated/divorced   | 1.86 | 1.20,2.86 | -    |           |
| 30 |                              |      |           |      |           |
| 31 | <b>Numbers of Children</b>   |      |           |      |           |
| 32 | no child                     | 1    |           | 1    |           |
| 33 | 1-2 children                 | 0.68 | 0.56,0.83 | 0.68 | 0.56,0.84 |
| 34 | 3 and above children         | 0.84 | 0.68,1.04 | 0.75 | 0.59,0.93 |
| 35 |                              |      |           |      |           |
| 36 | <b>Ethnicity</b>             |      |           |      |           |
| 37 | Sindhi                       | 1    |           | -    |           |
| 38 | Punjabi                      | 1.84 | 1.31,2.58 | -    |           |
| 39 | Balochi                      | 1.26 | 0.74,2.14 | -    |           |
| 40 | Pashtu                       | 1.68 | 1.12,2.51 | -    |           |
| 41 | Urdu                         | 1.45 | 1.11,1.89 | -    |           |
| 42 | Others                       | 1.84 | 1.32,2.56 | -    |           |
| 43 |                              |      |           |      |           |
| 44 |                              |      |           |      |           |
| 45 | <b>Home Status</b>           |      |           |      |           |
| 46 | Own                          | 1    |           | -    |           |
| 47 | Rent                         | 0.96 | 0.81,1.14 | -    |           |
| 48 | Other Arrangement            | 0.70 | 0.44,1.10 | -    |           |
| 49 |                              |      |           |      |           |
| 50 | <b>Smoking Status</b>        |      |           |      |           |
| 51 | No                           | 1    |           | -    |           |
| 52 | Yes                          | 0.80 | 0.65,1.00 | -    |           |
| 53 |                              |      |           |      |           |
| 54 | <b>Visiting Faith Healer</b> |      |           |      |           |
| 55 | No                           | 1    |           | 1    |           |
| 56 | Yes                          | 2.44 | 1.96,3.03 | 2.31 | 1.84,2.90 |

COR = unadjusted odds ratios, CI = confidence intervals.  
 AOR = adjusted odds ratios, only variables with p-value<0.250 in univariate analysis were entered into adjusted model using stepwise selection.

**Table 3: Univariate and multivariate analysis of anxiety & depressive symptom with number of chronic diseases among adults (n=2867)**

| Characteristics                   | n (%)      | Anxiety and depressive symptoms |           |      |           |
|-----------------------------------|------------|---------------------------------|-----------|------|-----------|
|                                   |            | COR                             | 95% CI    | AOR  | 95% CI    |
| <b>Number of chronic diseases</b> |            |                                 |           |      |           |
| None                              | 152 (24.6) | 1                               |           | 1    |           |
| One                               | 192 (23.7) | 0.95                            | 0.74,1.21 | 0.89 | 0.69,1.14 |
| Two                               | 181 (25.5) | 1.05                            | 0.81,1.34 | 0.98 | 0.76,1.27 |
| Three                             | 134 (29.8) | 1.30                            | 0.99,1.71 | 1.20 | 0.90,1.59 |
| Four                              | 76 (42.2)  | 2.24                            | 1.58,3.17 | 1.92 | 1.33,2.78 |
| Five +                            | 51 (50.0)  | 3.06                            | 1.99,4.70 | 2.62 | 1.66,4.13 |

COR = unadjusted odds ratios, CI = confidence intervals.

AOR = adjusted odds ratios, for all variables with p-value<0.250 in univariate analysis (Age, Gender, Education, Occupation, Marital status, Number of children, Ethnicity, Home status, Smoking status, Visiting faith healer).

1  
2  
3  
4  
5  
6  
7  
8  
9  
10  
11  
12  
13  
14  
15  
16  
17  
18  
19  
20  
21  
22  
23  
24  
25  
26  
27  
28  
29  
30  
31  
32  
33  
34  
35  
36  
37  
38  
39  
40  
41  
42  
43  
44  
45  
46  
47  
48  
49  
50  
51  
52  
53  
54  
55  
56  
57  
58  
59  
60

For peer review only

|                            |                     | Reporting Item                                                                                                                                                                                                                                                       | Page Number |
|----------------------------|---------------------|----------------------------------------------------------------------------------------------------------------------------------------------------------------------------------------------------------------------------------------------------------------------|-------------|
| Title                      | <a href="#">#1a</a> | Indicate the study's design with a commonly used term in the title or the abstract                                                                                                                                                                                   | 01          |
| Abstract                   | <a href="#">#1b</a> | Provide in the abstract an informative and balanced summary of what was done and what was found                                                                                                                                                                      | 02-03       |
| Background / rationale     | <a href="#">#2</a>  | Explain the scientific background and rationale for the investigation being reported                                                                                                                                                                                 | 07          |
| Objectives                 | <a href="#">#3</a>  | State specific objectives, including any prespecified hypotheses                                                                                                                                                                                                     | 07          |
| Study design               | <a href="#">#4</a>  | Present key elements of study design early in the paper                                                                                                                                                                                                              | 08-09       |
| Setting                    | <a href="#">#5</a>  | Describe the setting, locations, and relevant dates, including periods of recruitment, exposure, follow-up, and data collection                                                                                                                                      | 08-09       |
| Eligibility criteria       | <a href="#">#6a</a> | Give the eligibility criteria, and the sources and methods of selection of participants.                                                                                                                                                                             | 08          |
|                            | <a href="#">#7</a>  | Clearly define all outcomes, exposures, predictors, potential confounders, and effect modifiers. Give diagnostic criteria, if applicable                                                                                                                             | 09-10       |
| Data sources / measurement | <a href="#">#8</a>  | For each variable of interest give sources of data and details of methods of assessment (measurement). Describe comparability of assessment methods if there is more than one group. Give information separately for for exposed and unexposed groups if applicable. | 09-11       |
| Bias                       | <a href="#">#9</a>  | Describe any efforts to address potential sources of bias                                                                                                                                                                                                            | 07          |



|                        |                      |                                                                                                                                                                                                                                                                            |              |
|------------------------|----------------------|----------------------------------------------------------------------------------------------------------------------------------------------------------------------------------------------------------------------------------------------------------------------------|--------------|
| Study size             | <a href="#">#10</a>  | Explain how the study size was arrived at                                                                                                                                                                                                                                  | 08           |
| Quantitative variables | <a href="#">#11</a>  | Explain how quantitative variables were handled in the analyses. If applicable, describe which groupings were chosen, and why                                                                                                                                              | 11-12        |
| Statistical methods    | <a href="#">#12a</a> | Describe all statistical methods, including those used to control for confounding                                                                                                                                                                                          | 11-12        |
|                        | <a href="#">#12b</a> | Describe any methods used to examine subgroups and interactions                                                                                                                                                                                                            | n/a          |
|                        | <a href="#">#12c</a> | Explain how missing data were addressed                                                                                                                                                                                                                                    | 13           |
|                        | <a href="#">#12d</a> | If applicable, describe analytical methods taking account of sampling strategy                                                                                                                                                                                             | 09           |
|                        | <a href="#">#12e</a> | Describe any sensitivity analyses                                                                                                                                                                                                                                          | n/a          |
| Participants           | <a href="#">#13a</a> | Report numbers of individuals at each stage of study—eg numbers potentially eligible, examined for eligibility, confirmed eligible, included in the study, completing follow-up, and analysed. Give information separately for exposed and unexposed groups if applicable. | n/a          |
|                        | <a href="#">#13b</a> | Give reasons for non-participation at each stage                                                                                                                                                                                                                           | n/a          |
|                        | <a href="#">#13c</a> | Consider use of a flow diagram                                                                                                                                                                                                                                             | n/a          |
| Descriptive data       | <a href="#">#14a</a> | Give characteristics of study participants (eg demographic, clinical, social) and information on exposures and potential confounders. Give information separately for exposed and unexposed groups if applicable.                                                          | 06, Table 01 |
|                        | <a href="#">#14b</a> | Indicate number of participants with missing data for each variable of interest                                                                                                                                                                                            | n/a          |

|                  |                      |                                                                                                                                                                                                          |         |
|------------------|----------------------|----------------------------------------------------------------------------------------------------------------------------------------------------------------------------------------------------------|---------|
| Outcome data     | <a href="#">#15</a>  | Report numbers of outcome events or summary measures. Give information separately for exposed and unexposed groups if applicable.                                                                        | 06-07   |
| Main results     | <a href="#">#16a</a> | Give unadjusted estimates and, if applicable, confounder-adjusted estimates and their precision (eg, 95% confidence interval). Make clear which confounders were adjusted for and why they were included | Table 3 |
|                  | <a href="#">#16b</a> | Report category boundaries when continuous variables were categorized                                                                                                                                    | 10      |
|                  | <a href="#">#16c</a> | If relevant, consider translating estimates of relative risk into absolute risk for a meaningful time period                                                                                             | n/a     |
| Other analyses   | <a href="#">#17</a>  | Report other analyses done—e.g., analyses of subgroups and interactions, and sensitivity analyses                                                                                                        | n/a     |
| Key results      | <a href="#">#18</a>  | Summarise key results with reference to study objectives                                                                                                                                                 | 13-14   |
| Limitations      | <a href="#">#19</a>  | Discuss limitations of the study, taking into account sources of potential bias or imprecision. Discuss both direction and magnitude of any potential bias.                                              | 4 & 17  |
| Interpretation   | <a href="#">#20</a>  | Give a cautious overall interpretation considering objectives, limitations, multiplicity of analyses, results from similar studies, and other relevant evidence.                                         | 18      |
| Generalisability | <a href="#">#21</a>  | Discuss the generalisability (external validity) of the study results                                                                                                                                    | 15-17   |
| Funding          | <a href="#">#22</a>  | Give the source of funding and the role of the funders for the present study and, if applicable,                                                                                                         | 18      |

1  
2  
3  
4  
5  
6  
7  
8  
9  
10  
11  
12  
13  
14  
15  
16  
17  
18  
19  
20  
21  
22  
23  
24  
25  
26  
27  
28  
29  
30  
31  
32  
33  
34  
35  
36  
37  
38  
39  
40  
41  
42  
43  
44  
45  
46  
47  
48  
49  
50  
51  
52  
53  
54  
55  
56  
57  
58  
59  
60

|  |  |                                                              |  |
|--|--|--------------------------------------------------------------|--|
|  |  | for the original study on which the present article is based |  |
|--|--|--------------------------------------------------------------|--|

For peer review only

# BMJ Open

## Prevalence of anxiety and depressive symptoms and their association with multimorbidity and demographic factors: A community-based cross sectional survey in Karachi, Pakistan

|                                 |                                                                                                                                                                                                                                                                                                                                                      |
|---------------------------------|------------------------------------------------------------------------------------------------------------------------------------------------------------------------------------------------------------------------------------------------------------------------------------------------------------------------------------------------------|
| Journal:                        | <i>BMJ Open</i>                                                                                                                                                                                                                                                                                                                                      |
| Manuscript ID                   | bmjopen-2019-029315.R2                                                                                                                                                                                                                                                                                                                               |
| Article Type:                   | Original research                                                                                                                                                                                                                                                                                                                                    |
| Date Submitted by the Author:   | 16-Oct-2019                                                                                                                                                                                                                                                                                                                                          |
| Complete List of Authors:       | Farooq, Salima; Aga Khan University Faculty of Health Sciences, Institute of Nursing<br>Khan, Tahir; School of Public Health,<br>Zaheer, Sidra; Dow University of Health Sciences, School of Public Health<br>Shafique, Kashif; Dow University of Health Sciences, School of Public Health; University of Glasgow, Institute of Health and Wellbeing |
| <b>Primary Subject Heading</b>: | Epidemiology                                                                                                                                                                                                                                                                                                                                         |
| Secondary Subject Heading:      | Public health, Epidemiology, Mental health                                                                                                                                                                                                                                                                                                           |
| Keywords:                       | Multi-morbidity, Anxiety and Depression, Adult health                                                                                                                                                                                                                                                                                                |
|                                 |                                                                                                                                                                                                                                                                                                                                                      |

SCHOLARONE™  
Manuscripts

# Prevalence of anxiety and depressive symptoms and their association with multimorbidity and demographic factors: A community-based cross sectional survey in Karachi, Pakistan

## Author Details

### 1. SalimaFarooq

School of Nursing and Midwifery

Aga Khan University, Karachi

[salima.farooq@aku.edu](mailto:salima.farooq@aku.edu)

021-34865274

### 2. Muhammad Tahir Khan (Corresponding Author)

School of Public Health

Dow University of Health Science

[tahir.khan@duhs.edu.pk](mailto:tahir.khan@duhs.edu.pk)

+92 300 9257633

### 3. Sidra Zaheer

School of Public Health

Dow University of Health Science

[sidra.zaheer@duhs.edu.pk](mailto:sidra.zaheer@duhs.edu.pk)

### 4. KashifShafique

School of Public Health

Dow University of Health Science

[k.shafique@duhs.edu.pk](mailto:k.shafique@duhs.edu.pk)

Institute of Health and Wellbeing,

Public Health, University of Glasgow,

Glasgow, United Kingdom

[kashif.shafique@glasgow.ac.uk](mailto:kashif.shafique@glasgow.ac.uk)

## Details of manuscript:

Total words count of manuscript excluding tables, references and abstract: 3317

Word count of abstract:261

Number of tables: 03

Number of figures: Zero (0)

## Abstract

### Objectives

This study aimed to estimate the prevalence of anxiety and depressive symptoms and their association with multimorbidity and the demographic characteristics of adults, aged 30 years and above, in Karachi, Pakistan.

### Design

Observational cross-sectional study

### Study Setting and Participants

The study was carried out among a general population, aged 30 years and above, residing in the Gulshan-e-Iqbal town of Karachi, Pakistan. The study participants were recruited using the systematic random sampling approach, based on the inclusion criteria. The data collected from 2,867 participants was analyzed.

### Main Outcome Measures

The primary outcome of the study was the prevalence of anxiety and depressive symptoms, measured with the Aga Khan University Anxiety Depression Scale (AKUADS). The secondary outcome of the study was the association of anxiety and depressive symptoms with multimorbidity, as well as with the socio-demographic characteristics of the participants, using binary logistic regression.

## Results

Out of 2,867 individuals, 27.4% participants reported having anxiety and depressive symptoms. The multivariate logistic regression model revealed that the presence of multimorbidity (AOR=1.33, 95% CI: 1.11, 1.58), female gender (AOR= 2.40, 95% CI: 2.01, 2.87), illiteracy (AOR=1.51, 95% CI: 1.09, 2.07), more number of children (AOR=0.74, 95% CI: 0.59,0.93), and visiting a faith healer (AOR=2.29, 95% CI: 1.82, 2.88) were the significant factors associated with anxiety and depressive symptoms.

## Conclusion

This study revealed a moderately high prevalence of anxiety and depressive symptoms among adults, aged 30 years and above, in Karachi, Pakistan. The key variables associated with anxiety and depressive symptoms were: multimorbidity, female gender, lower level of education, more number of children, and visiting faith healers.

## Key words

Multimorbidity, anxiety and depression, adults

## Strengths and limitations of this study

- The study sample was a large, community-based, ethnically and socio-economically diverse group of population.
- A validated screening tool (AKUADS) assessed the presence of anxiety and depressive symptoms, which enhanced the internal validity of the research.
- Inferences could not be drawn about causality of associations, due to the nature of the design.
- The study data was self-reported, hence, the results should be interpreted cautiously.



## Introduction

Mental illness, anxiety, and depressive symptoms are major public health issues. Globally, 14% people suffer from mental illnesses (1). More than three quarters of these people belong to low and middle income countries(2). The magnitude of anxiety and depression is on the rise among the general population. Additionally, individuals with chronic diseases are at even higher risk of developing anxiety and depressive symptoms (3-6). In fact, depression has been ranked as the fourth leading cause of disease burden (7). Moreover, it is predicted that by the year 2020, it will be the second leading cause of disability and death, after cardio vascular disorders (7-10).

Multimorbidity is the co-occurrence of two or more chronic diseases, such as cancer, diabetes, hypertension, stroke, asthma, heart disease, arthritis, or osteoporosis within an individual (9, 11, 12). Research studies suggest that one in four adults in developed countries has multimorbidity (13, 14). (15). One study claims that 52% of people, between the ages of 21 and 84 years are suffering from multimorbidity (16), whereas, a study conducted by Garin et al., (17) in 2014 found a burden of 67% multimorbidity among elder Spanish females. Furthermore, among developing countries, in Bangladesh, the prevalence of multimorbidity is 53.8% among older adults(11),in India the burden of multimorbidity is 22% (18),while-among the Pakistani population, aged 18 years and older, it was reported as 4.9% (19). Thus, the prevalence of multimorbidity varies from 4.9% to 67% between various countries (19-21).

The reasons for variation in prevalence could be due to differences in multimorbidity definitions, number of chronic conditions included in the studies, diagnostic criteria for medical conditions, as well as the study's sample size and population characteristics. Literature suggests that the prevalence of multimorbidity increases with age (12, 22), and this burden is reported to

1  
2  
3 be more common in females. Additionally, individuals living in underprivileged areas are at a  
4  
5 higher risk of developing multimorbidity (23).  
6

7  
8 Health care providers often face challenges when dealing with clients who have  
9  
10 multimorbidity, along with anxiety and depressive symptoms (24, 25). As multimorbidity  
11  
12 conditions such as diabetes, hypertension, stroke, asthma, arthritis, and osteoporosis have  
13  
14 synergetic effects with anxiety and depression, they increase the probability of disabilities  
15  
16 among patients (3). Moreover, Individuals with multimorbidity need to deal with multiple  
17  
18 treatment recommendations (6). Added to that, the presence of anxiety and depression with  
19  
20 multimorbidity leads to increase of utilization of health care facilities. This consequently leads to  
21  
22 financial health care burdens and poorer health outcomes (2, 13, 26, 27). Thus, anxiety and  
23  
24 depression, with multimorbidity, is linked with a 50% to 100% increase in the utilization of  
25  
26 health services and cost (28).  
27  
28  
29

30  
31 Anxiety and depression are extremely common and alarmingly underdiagnosed  
32  
33 healthcare problems, especially in low and middle income countries. In addition, they are  
34  
35 associated with social and self-stigma, which act as a barrier in the mental help seeking behavior  
36  
37 of individuals suffering from mental health issues, this leads to an even greater public health  
38  
39 concern. Furthermore, anxiety and depression are specifically reported to be common in  
40  
41 individuals with multimorbidity (3, 6). However, the studies that report these associations have  
42  
43 mostly been conducted in high income countries. To the best of our knowledge, no such  
44  
45 population based study has been reported from Pakistan as yet. In a resource limited setting like  
46  
47 Pakistan, under diagnosis of mental illnesses can cause potential delay in the initiation of  
48  
49 treatment. Hence, it is of utmost importance that anxiety and depression be screened in adults  
50  
51 suffering from multimorbidity, in order to reduce the burden of complications and suboptimal  
52  
53  
54  
55  
56  
57  
58  
59  
60

1  
2  
3 adherence to the treatment of multimorbidity conditions. Moreover, due to, scarcity of literature  
4 from Pakistan, requires quantification of the association between anxiety and depression with  
5 multimorbidity, within the Pakistani population is an urgent need. In this study, it was  
6 hypothesized that there is an association between anxiety and depressive symptoms and  
7 multimorbidity among the Pakistani population. Therefore, the purpose of this study was to  
8 estimate the prevalence of anxiety and depressive symptoms, and to determine their association  
9 with multimorbidity and demographic factors among adults, aged 30 years and above, in  
10 Karachi, Pakistan.  
11  
12  
13  
14  
15  
16  
17  
18  
19  
20  
21  
22  
23  
24  
25  
26  
27  
28  
29  
30  
31  
32  
33  
34  
35  
36  
37  
38  
39  
40  
41  
42  
43  
44  
45  
46  
47  
48  
49  
50  
51  
52  
53  
54  
55  
56  
57  
58  
59  
60

## Methodology

This study was a part of a larger community based research project, titled, “The Burden of Multimorbidity, Its Patterns and Consequences on Health and Well-Being: The IMPACT Study”, conducted in 2015-2016.

**Study design:** An observational cross-sectional study was conducted to estimate the burden of anxiety and depressive symptoms, and to identify their associated factors.

**Study population:** The study population comprised all adults aged 30 years and above, living in the Gulshan-e-Iqbal town, Karachi, Pakistan. This particular age group was selected for this study, as chronic medical conditions are more prevalent in this age group..

**Inclusion criteria:** All Persons, who were aged 30 years and above, who were the residents of the Gulshan-e-Iqbal town, Karachi, Pakistan, and who signed the consent form to take part in the study.

**Sample size calculation:** To meet the objective of this study, the sample size was calculated using an online version of Open Epi calculator. The prevalence of anxiety and depression is reported to be 30% to 50% among adults in Pakistan (29, 30). With a 2% margin of error and 95% confidence level, the required sample size was 2,401 participants. Similarly, for attaining the secondary objective (association of anxiety and depressive symptoms with multimorbidity), keeping the confidence interval of 95%, 90% power, 1:1 ratio of non-depressed and depressed individuals, with odds ratio of 1.55, and proportion of multimorbidity among non-depressed was taken as 10% (Smith et al., 2014), the required sample size was 2,148 individuals. In order to account for missing values, the higher sample size (2401) was chosen. Ultimately, however, 3,250 individuals were recruited for data collection.

1  
2  
3 **Sampling Technique:** The present study was conducted in the Gulshan-e-Iqbal town of Karachi,  
4  
5 Pakistan. A sample of 3,250 participants was recruited using the systematic random sampling  
6  
7 technique. This sample was achieved by using proportionate estimates of the number of  
8  
9 individuals in 13 Union Councils (UCs) in the selected town. The Proportionate allocation  
10  
11 method was used in order to allocate appropriate weightage to each UC. Within each UC, blocks  
12  
13 of houses were selected with a random start, where every 109<sup>th</sup> (k<sup>th</sup> sampling interval) household  
14  
15 was selected. Individuals within these households, who met the eligibility criteria, were included  
16  
17 in the study.  
18  
19  
20  
21

22 **Data Collection:** Data were collected from participants by interviewing them, with the help of a  
23  
24 structured questionnaire; the questionnaire was developed after a thorough literature review. The  
25  
26 questionnaire was designed to collect data related to socio demographic information including  
27  
28 age, gender, marital status, educational status, employment status, mother tongue, number of  
29  
30 family members and information about housing, presence of any chronic disease, and living  
31  
32 conditions of each participant. Participants were interviewed by trained data collectors; the  
33  
34 anthropometric measurements, as well as Blood Pressure were measured by trained health  
35  
36 professionals, mainly included doctors and nurses, who were involved in data collection.  
37  
38  
39  
40  
41  
42  
43

44 **Dependent variable:** The Aga Khan University Anxiety Depression Scale (AKUADS) was used  
45  
46 to assess the anxiety and depressive symptoms of the participants. This study used the Urdu  
47  
48 version of the AKUADS, which had been validated in a previous research (31). The value of the  
49  
50 reliability coefficient tool in the study population was 0.93. This tool had a total of 25 questions  
51  
52 and for each of the questions the participants could choose an answer from Never (scored as 0),  
53  
54 Sometimes (scored as 1), Often (scored as 2), Always (scored as 3). The cumulative cutoff score  
55  
56  
57  
58  
59  
60

1  
2  
3 of 20 or greater on this scale was used to label anxiety and depression. At a cutoff score of 20,  
4 the AKUADS had a sensitivity of 66% and a specificity of 79% (31, 32).  
5  
6  
7

8 **Independent Variables:** The presence of disease was assessed by a combination of self-reported  
9 diagnosis, medication use, and laboratory findings. Self-reported disease was determined by the  
10 question: “Have you ever been told by a doctor, nurse, or other health professional that you have  
11 hypertension, obesity, dyslipidemia, diabetes, heart diseases (Myocardial Infarction and/or  
12 chronic ischemic heart diseases), stroke, migraines, asthma and COPD, anemia, thyroid disease,  
13 diseases of bones and joints, dyspepsia/peptic ulcer, hepatitis B or C, chronic kidney diseases  
14 including stones, cancer, and/or disability?”.  
15  
16  
17  
18  
19  
20  
21  
22  
23  
24

25 Individuals with 2 or more chronic diseases (excluding anxiety and depression) were  
26 labeled as having ‘multimorbidity’ and others who reported one or no chronic medical disease  
27 were considered as having ‘no multimorbidity’. Set criteria were used to define chronic diseases,  
28 such as hypertension, obesity, diabetes, and dyspepsia. A person was said to be hypertensive if  
29 that person had a high systolic BP (>140 mm Hg) or a high diastolic BP (>90 mm Hg). A person  
30 was considered obese if they had a calculated BMI  $\geq 30.0$  kg/m<sup>2</sup>. A person was said to be  
31 diabetic if their blood glucose level was  $\geq 200$  mg/dl. A person was considered having dyspepsia  
32 if they had four or more symptoms of dyspepsia for at least 6 months, based on the Leeds  
33 Dyspepsia Questionnaire (LDQ).  
34  
35  
36  
37  
38  
39  
40  
41  
42  
43  
44  
45

46  
47 Beside disease related variables, other socio demographic variables were also measured, such as  
48 household income, occupation, and education. This variable was initially taken as continuous  
49 variable, such as what is your monthly income (in Pakistani Rupees). Then it was further  
50 classified into quintiles, i.e. < 16,000, 16,001-24,999, 25,000-39,999, 40,000-54,999 and 55,000  
51  
52  
53  
54  
55  
56  
57  
58  
59  
60

1  
2  
3 rupees and above. The occupation of all the participants was also assessed as a categorical  
4 variable and had categories such as unemployed, unskilled worker, skilled worker, labor worker,  
5 non-manual worker and professional office job. Data on education were collected as total  
6 number of years of full education, which was then categorized into five categories No education  
7 (0 years or those who never attended school), Primary (1-5 years), Secondary (6-10 years),  
8 Higher education (11-14 years)  
9  
10 Postgraduate ( $\geq 15$  years)  
11  
12  
13  
14  
15  
16  
17  
18  
19  
20  
21  
22

23 **Ethical considerations:** The study's proposal was approved by The Institutional Review Board  
24 (IRB) of the Dow University of Health Sciences, reference number: Ref: IRB-  
25 554/DUHS/Approval/2015/04. Only individuals who provided written informed consent were  
26 interviewed. A referral plan for counseling was made for participants who scored 20 and above  
27 on the AKUADS scale.  
28  
29  
30  
31  
32  
33  
34  
35  
36

37 **Statistical Analysis:** Variables were pre-coded and data were entered and analyzed in the SPSS  
38 version 19.0. Descriptive statistics were calculated in the form of frequencies and percentages for  
39 categorical variables. Descriptive statistics were calculated in order to estimate the prevalence of  
40 anxiety and depressive symptoms. Univariate and multivariate binary logistics regressions were  
41 used to assess the associations between anxiety and depressive symptoms and multimorbidity  
42 and odd ratios and their 95% confidence intervals were also calculated. The multivariate model  
43 was adjusted only for variables with p-values  $< 0.250$  in univariate analysis, using a step-wise  
44 logistic regression method, following the Hosmer and Lemeshow protocol (33). Moreover, this  
45 manuscript has followed STROBE cross sectional reporting guidelines (34).  
46  
47  
48  
49  
50  
51  
52  
53  
54  
55  
56  
57  
58  
59  
60

1  
2  
3 **Patient and public involvement:** In the current study, patients were not involved in the  
4  
5  
6 research question, study design, outcome measures, and recruitment.  
7  
8  
9  
10  
11  
12  
13  
14  
15  
16  
17  
18  
19  
20  
21  
22  
23  
24  
25  
26  
27  
28  
29  
30  
31  
32  
33  
34  
35  
36  
37  
38  
39  
40  
41  
42  
43  
44  
45  
46  
47  
48  
49  
50  
51  
52  
53  
54  
55  
56  
57  
58  
59  
60

For peer review only



## Results

A total of 3,250 participants were interviewed. However, the data were analyzed using information from 2,867 study participants. Of the total, 383 participants were excluded due to missing information on the variables: anxiety & depression symptoms (n=06), presence of multimorbidity (n=09), respondent age (n=06), gender (n=08), education (n=48), income (n=81), occupation (n=72), marital status (n=05), number of children (n=67), ethnicity (n=09), home status (n=14), smoking status (n=66), and visiting faith healer (n=93).

The mean age of the 2,867 study participants was 45.5 years (SD  $\pm$ 11.7 years). The male/female ratio was approximately equal, males 51.5 % (n=1,477), females 48.5% (n=1,390). Regarding the educational level of the participants, 14% (n=404) had no formal education, 38.3% (n=1098) had higher education, and 20.4% (n=585) had postgraduate education. In addition, 22.3% (n=638) reported their monthly household income to be less than 16,000 rupees, while 18.2% (n=523) claimed their monthly income to be more than 55,000 rupees. The majority of participants 42% (n=1205) had professional jobs, 14% (n=389) were laborers, and 17% (n=484) participants were unemployed. The study participants reported anxiety and depressive symptoms, and multimorbidity as 27.4% (n=786) and 50.2% (n=1440), respectively. The socio-demographic and other characteristics of the participants are shown in Table 1.

The adjusted model revealed that participants who had multimorbidity had 33% increased odds of being anxious and depressed (AOR=1.33, 95% CI: 1.11, 1.58), as compared to those who did not report multimorbidity. Moreover, the odds of having anxiety and depressive symptoms were 2.40 times higher among females, as compared to male participants (AOR=2.40, 95% CI: 2.01, 2.87). And the odds of having anxiety and depressive symptoms were 51% higher among participants who had no formal education (AOR=1.51, 95% CI: 1.09, 2.07), as

1  
2  
3 compared to participants who had postgraduate education. Furthermore, the odds of being  
4  
5 anxious and depressed were 1.34 times higher among participants who did labor work as  
6  
7 compared to participants who were doing professional office jobs (AOR=1.34, 95% CI: 1.00,  
8  
9 1.79). Also, study participants who had 1 to 2 children were at 32% reduced odds (AOR=0.68,  
10  
11 95% CI: 0.56, 0.84), and those who had more than two children were at 26% reduced odds  
12  
13 (AOR=0.74, 95% CI: 0.59, 0.93) of having anxiety and depressive symptoms, as compared to  
14  
15 participants who had no children. Furthermore, Subjects belonging to the Punjabi ethnicity  
16  
17 (AOR=1.66, 95% CI: 1.16, 2.37), had 66% increased odd of being anxious and depressed as  
18  
19 compared to Sindhi subjects. In addition, subjects who were visiting a faith healer were 2.29  
20  
21 times (AOR=2.29, 95% CI: 1.82, 2.88) odds of exhibiting anxiety and depressive symptoms, as  
22  
23 compared to participants who did not visit a faith healer (Table 2).  
24  
25  
26  
27  
28

29  
30 Table 3 shows the estimated association of anxiety and depressive symptoms and the  
31  
32 number of chronic diseases. The anxiety and depressive symptoms were significantly associated  
33  
34 with increasing number of chronic diseases. The odds of anxiety and depressive symptoms were  
35  
36 highest among individuals with four chronic diseases (AOR=1.92, 95% CI: 1.33, 2.78), and more  
37  
38 than four chronic diseases (AOR=2.62, 95% CI: 1.66, 4.13), as compared with healthy  
39  
40 individuals, when adjusted for other variables (Table 3).  
41  
42  
43  
44  
45  
46  
47  
48  
49  
50  
51  
52  
53  
54  
55  
56  
57  
58  
59  
60

## Discussion

This study showed that nearly one fourth of the study participants had symptoms of anxiety and depression. Moreover, it illustrated that the presence of multimorbidity, female gender, lower level of education, more number of children, ethnicity and visiting a faith healer were significantly associated with anxiety and depressive symptoms.

The current study used a screening tool (AKUADS) to assess the presence of anxiety and depressive symptoms. According to the findings, the overall prevalence of anxiety and depressive symptoms was 27.4%. This has previously been reported to be around 10% and 44%, in developed and developing countries, respectively (35, 36). Islam et al., in their study conducted in 2003 (37), found a 28% prevalence of depression among the Bangladesh population. In the United States, the prevalence of anxiety and depression was reported to be 16.2% (38). Papadopoulos et al.,(39) reported that the prevalence of depression in Greece as 27%. Whereas in India, the prevalence of depression was found to be 28% (40). However, in Pakistan, the prevalence of depression and anxiety has been found to be around 30% to 50 % (29, 35, 36, 41). A plausible reason for the difference in the prevalence of anxiety and depression could be different inclusion criteria, sample sizes, recruitment methods, various screening tools, and cutoff points that were employed in these diverse studies (21).

In the past decade, several research studies have established a strong relationship between anxiety and depression and multimorbidity (4, 6, 9, 42). The findings of the present study were in concurrence with the previous studies, showing a significant association between anxiety and depression, and multimorbidity (6, 9, 43-46). A probable reason could be that mental illness is linked with unhealthy habits, such as smoking, poor self-care, lack of physical activities, and poor medication compliance (44, 47).

1  
2  
3 In the present study, anxiety and depressive symptoms were found to be strongly  
4 associated with females. The prevalence of anxiety and depressive symptoms were found to be  
5 2.5 times higher in females than in males. Likewise, previous studies have also revealed a  
6 positive association between anxiety, depression, and gender. A research conducted by Mirza  
7 and Jenkin (41) found that the prevalence of anxiety and depressive symptoms were 29-66%  
8 among females, as compared to 10-33% in males, Plausible reasons for the higher prevalence of  
9 anxiety and depression among women could be biological factors, socio-economical  
10 disadvantages, deprivation of social status, maladaptive coping styles, and lack of a support  
11 system for females in our country (48).  
12  
13  
14  
15  
16  
17  
18  
19  
20  
21  
22  
23

24 The current study also found illiteracy as one of the potential risk factors among  
25 participants. Similarly, previous studies have found a strong association between low levels of  
26 education, and anxiety and depressive symptoms (49, 50). Among the literate population,  
27 education could be one of the factors that facilitates adaptive coping skills amongst them, and  
28 enables them to deal with distress situations and in improving their self-confidence, self-efficacy,  
29 social skills building and developing a sense of control over the environment (51).  
30  
31  
32  
33  
34  
35  
36  
37  
38

39 According to the findings of the current study, participants who bore more children were  
40 less likely to develop anxiety and depressive symptoms. The plausible reason could be that  
41 parents tend to positively engage with their children and to be bound with their lives children by  
42 giving them continuous love, time, supports and commitment, which can all be coping strategies  
43 against distress. More number of children can also act as a buffer, considering the cultural  
44 dimension of the south Asian population where older children serve as a financial security for the  
45 family (52). Moreover, they also perform the role of caretaker, and/or may contribute to family  
46 house hold chores. This provides positive hope to the family that their future financial and social  
47  
48  
49  
50  
51  
52  
53  
54  
55  
56  
57  
58  
59  
60

1  
2  
3 security is warranted and, thus, decreases anxiety and depression. In contrast, other studies have  
4  
5 found that having more children is a risk factor for anxiety and depression among women (49,  
6  
7 53).

10  
11 Our study also revealed that ethnicity of a participant is linked with anxiety and  
12  
13 depressive symptoms. Subjects who were Punjabi were more likely to have anxiety and  
14  
15 depressive symptoms. Consistent findings were reported by former studies that ethnicity was a  
16  
17 significant risk factor for depression (54, 55). However, another study reported no association  
18  
19 between these variables (53).

22  
23 A notable finding of the present study was that visiting a faith healer was positively  
24  
25 associated with anxiety and depression among both genders. In the Pakistani culture, distressed  
26  
27 individuals generally seek help from traditional healers or faith healers prior to visiting a doctor  
28  
29 or a psychiatrist for their illness. A few probable reasons why people visit faith healers could  
30  
31 their easy accessibility, availability, and affordability, cultural beliefs and the predominant  
32  
33 stigma attached to the notion of mental illness (53, 56). Moreover, in Pakistan, many people  
34  
35 believe that mental illnesses are due to wrong doings, being possessed, witchcraft, and evil  
36  
37 spirits; hence, the affected population consults these faith healers rather than doctors. Our result  
38  
39 is consistent with a past study, where it was reported that sixteen percent of the Pakistani  
40  
41 population first approaches faith healers for their illness (57).

## 47 **Strengths and Limitations**

50  
51 This is probably the first research that has determined an association of anxiety and  
52  
53 depressive symptoms with multimorbidity, among the population in Pakistan. Due to the cross-  
54  
55 sectional nature of study inferences could not be determined about the causality of the  
56  
57

1  
2  
3 relationship. Potential risk factors, such as, family history of psychiatric disorders, marital  
4 dissatisfaction, domestic violence, maladaptive coping, current life stressors, and death of a  
5 loved one, could not be addressed in the current study. Moreover, this study was based on self-  
6 reported information about multimorbidity, and anxiety and depression.  
7  
8  
9  
10  
11  
12  
13  
14

## 15 **Conclusion**

16  
17  
18 This study suggests that almost one quarter of the study population had anxiety and depressive  
19 symptoms. Among females, the anxiety and depressive symptoms are twice as common as  
20 compared to males. Early prevention and screenings are the key measures for preventing the  
21 rising burden of mental disorders, when dealing with chronic physical conditions. Therefore, there  
22 is a dire need to create awareness regarding identification of symptoms of mental illness and to  
23 develop a proper referral system for essential treatment at the early stage of the disease, to avoid  
24 delayed presentation when the disease is more advanced.  
25  
26  
27  
28  
29  
30  
31  
32  
33  
34

## 35 **Author Contributions**

36  
37  
38 KS and SF conceived the research question and the design of this project. SF conducted all the  
39 literature reviews and manuscript drafting and reviewing, as well as took part in data collection.  
40 MTK and SZ helped in the data analysis, preparation of tables, and reviewed the manuscript. KS  
41 supervised the research project and conducted the final editing and review of the manuscript. The  
42 final version of this manuscript was seen and approved by all contributors.  
43  
44  
45  
46  
47  
48  
49  
50

## 51 **Conflicts of Interest**

52  
53 None  
54  
55  
56  
57  
58  
59  
60

## Data availability statement

The data is available on request from the corresponding author.

## Funding

None

## Acknowledgement

We would like to acknowledge the contributions of Ms. Yasmin Parpio and Ms. Ambreen Gowani in this research work.

## References

1. Yatham S, Sivathasan S, Yoon R, da Silva TL, Ravindran AV. Depression, anxiety, and post-traumatic stress disorder among youth in low and middle income countries: a review of prevalence and treatment interventions. *Asian journal of psychiatry*. 2018;38:78-91.
2. Jordans MJ, Kaufman A, Brenman NF, Adhikari RP, Luitel NP, Tol WA, et al. Suicide in South Asia: a scoping review. *BMC psychiatry*. 2014;14(1):358.
3. Deschênes SS, Burns RJ, Schmitz N. Associations between depression, chronic physical health conditions, and disability in a community sample: A focus on the persistence of depression. *Journal of affective disorders*. 2015;179:6-13.
4. Winkler P, Horáček J, Weisssová A, Šustr M, Brunovský M. Physical Comorbidities in Depression Co-Occurring with Anxiety: A Cross Sectional Study in the Czech Primary Care System. *International journal of environmental research and public health*. 2015;12(12):15728-38.
5. Levinson D, Karger CJ, Haklai Z. Chronic physical conditions and use of health services among persons with mental disorders—results from the Israel National Health Survey. *General hospital psychiatry*. 2008;30(3):226-32.
6. Gunn JM, Ayton DR, Densley K, Pallant JF, Chondros P, Herrman HE, et al. The association between chronic illness, multimorbidity and depressive symptoms in an Australian primary care cohort. *Social psychiatry and psychiatric epidemiology*. 2012;47(2):175-84.
7. Moussavi S, Chatterji S, Verdes E, Tandon A, Patel V, Ustun B. Depression, chronic disease and decrements in health: Evidence from the World Health Surveys. *Lancet*. 2007;369:851-8.
8. Mathers C, Fat DM, Boerma JT. The global burden of disease: 2004 update: World Health Organization; 2008.
9. O'Connor K, Vizcaino M, Ibarra JM, Balcazar H, Perez E, Flores L, et al. Multimorbidity in a Mexican Community: Secondary Analysis of Chronic Illness and Depression Outcomes. *International journal of nursing (New York, NY)*. 2015;2(1):35.
10. WHO. Depression and other common mental disorders: global health estimates. 2017.
11. Khanam MA, Streatfield PK, Kabir ZN, Qiu C, Cornelius C, Wahlin Å. Prevalence and patterns of multimorbidity among elderly people in rural Bangladesh: a cross-sectional study. *Journal of health, population, and nutrition*. 2011;29(4):406.
12. Liddy C, Blazkho V, Mill K. Challenges of self-management when living with multiple chronic conditions Systematic review of the qualitative literature. *Canadian Family Physician*. 2014;60(12):1123-33.
13. Ahmadi B, Alimohammadian M, Yaseri M, Majidi A, Boreiri M, Islami F, et al. Multimorbidity: Epidemiology and Risk Factors in the Golestan Cohort Study, Iran: A Cross-Sectional Analysis. *Medicine*. 2016;95(7):e2756.
14. Alaba O, Chola L. The social determinants of multimorbidity in South Africa. *Int J Equity Health*. 2013;12(1):1-10.
15. Chatterji S, Byles J, Cutler D, Seeman T, Verdes E. Health, functioning, and disability in older adults—present status and future implications. *The Lancet*. 2015;385(9967):563-75.
16. Aarts S, van den Akker M, Bosma H, Tan F, Verhey F, Metsemakers J, et al. The effect of multimorbidity on health related functioning: Temporary or persistent? Results from a longitudinal cohort study. *Journal of psychosomatic research*. 2012;73(3):211-7.
17. Garin N, Olaya B, Perales J, Moneta MV, Miret M, Ayuso-Mateos JL, et al. Multimorbidity patterns in a national representative sample of the Spanish adult population. *PloS one*. 2014;9(1).



18. Akinsulore A, Esimai OA, Afolabi OT, Aloba OO, Mapayi BM. Prevalence and factors associated with depressive symptoms among Yoruba adults in a semi-urban community in South-Western Nigeria. *Journal of Behavioral Health*. 2015;4(3):81-6.
19. Afshar S, Roderick PJ, Kowal P, Dimitrov BD, Hill AG. Multimorbidity and the inequalities of global ageing: a cross-sectional study of 28 countries using the World Health Surveys. *BMC public health*. 2015;15(1):1.
20. Roberts K, Rao D, Bennett T, Loukine L, Jayaraman G. Prevalence and patterns of chronic disease multimorbidity and associated determinants in Canada. *Health Promotion*. 2015;35(6):87-94.
21. Taylor AW, Price K, Gill TK, Adams R, Pilkington R, Carrangis N, et al. Multimorbidity-not just an older person's issue. Results from an Australian biomedical study. *BMC public health*. 2010;10(1):1.
22. Marengoni A, Angleman S, Melis R, Mangialasche F, Karp A, Garmen A, et al. Aging with multimorbidity: a systematic review of the literature. *Ageing research reviews*. 2011;10(4):430-9.
23. Orueta JF, Nuño-Solinís R, García-Alvarez A, Alonso-Morán E. Prevalence of multimorbidity according to the deprivation level among the elderly in the Basque Country. *BMC public health*. 2013;13(1):918.
24. Roca M, Gili M, Garcia-Garcia M, Salva J, Vives M, Campayo JG, et al. Prevalence and comorbidity of common mental disorders in primary care. *Journal of affective disorders*. 2009;119(1):52-8.
25. Naqvi H, Khan MM. Depression in primary care: difficulties and paradoxes. *JPMA* 2005;55(9):393.
26. Uijen AA, van de Lisdonk EH. Multimorbidity in primary care: prevalence and trend over the last 20 years. *The European journal of general practice*. 2008;14(sup1):28-32.
27. Lockett H, Lai J, Tuason C, Jury A, Fergusson D. Primary healthcare utilisation among adults with mood and anxiety disorders: an analysis of the New Zealand Health Survey. *Journal of Primary Health Care*. 2018;10(1):68-75.
28. Simon GE, VonKorff M, Barlow W. Health care costs of primary care patients with recognized depression. *Archives of general psychiatry*. 1995;52(10):850-6.
29. Ali B, Amanullah S. Prevalence of anxiety and depression in an urban squatter settlement of Karachi. *JCPSP, Journal of the College of Physicians and Surgeons-Pakistan*. 2000;10(1):4-6.
30. Waheed A, Hameed K, Khan AM, Syed J, Mirza AI. The burden of anxiety and depression among patients with chronic rheumatologic disorders at a tertiary care hospital clinic in Karachi, Pakistan. *JPMA The Journal of the Pakistan Medical Association*. 2006;56(5):243-7.
31. Ali BS. Validation of an indigenous screening questionnaire for anxiety and depression in an urban squatter settlement of Karachi. *J Coll Physicians Surg Pak*. 1998;8:207-11.
32. Ali BS, Reza H. Development of an indigenous screening instrument in Pakistan: the Aga Khan University Anxiety and Depression Scale. *JPMA* 1998;48:261-5.
33. Hosmer Jr DW, Stanley Lemeshow, and Rodney X Sturdivant. *Applied logistic regression*: John Wiley & Sons; 2013.
34. Von Elm E, Altman DG, Egger M, Pocock SJ, Gøtzsche PC, Vandenbroucke JP, et al. The Strengthening the Reporting of Observational Studies in Epidemiology (STROBE) statement: guidelines for reporting observational studies. *PLoS medicine*. 2007;4(10):e296.
35. Luni FK, Ansari B, Jawad A, Dawson A, Baig SM. Prevalence of depression and anxiety in a village in Sindh. *J Ayub Med Coll Abbottabad*. 2009;21(2):68-72.
36. Muhammad Gadit AA, Mugford G. Prevalence of depression among households in three capital cities of Pakistan: need to revise the mental health policy. *Plos one*. 2007;2(2):e209.
37. Islam MM, Ali M, Ferroni P, Underwood P, Alam MF. Prevalence of psychiatric disorders in an urban community in Bangladesh. *General hospital psychiatry*. 2003;25(5):353-7.

- 1
- 2
- 3
- 4 38. Kessler RC, Berglund P, Demler O, Jin R, Koretz D, Merikangas KR, et al. The epidemiology of
- 5 major depressive disorder: results from the National Comorbidity Survey Replication (NCS-R). *JAMA*.
- 6 2003;289(23):3095-105.
- 7 39. Papadopoulos F, Petridou E, Argyropoulou S, Kontaxakis V, Dessypris N, Anastasiou A, et al.
- 8 Prevalence and correlates of depression in late life: a population based study from a rural Greek town.
- 9 *Int J Geriatr Psychiatry*. 2005;20(4):350-7.
- 10 40. Patel V, Prince M. Ageing and mental health in a developing country: who cares? Qualitative
- 11 studies from Goa, India. *Psychological Medicine*. 2001;31(01):29-38.
- 12 41. Mirza I, Jenkins R. Risk factors, prevalence, and treatment of anxiety and depressive disorders in
- 13 Pakistan: systematic review. *Bmj*. 2004;328(7443):794.
- 14 42. Smith DJ, McLean G, Martin D, Langan MJ, Guthrie B, Gunn J, et al. Depression and
- 15 multimorbidity: a cross-sectional study of 1,751,841 patients in primary care. *The Journal of clinical*
- 16 *psychiatry*. 2014;75(11):1202-8.
- 17 43. Patten SB. Long-term medical conditions and major depression in a Canadian population study
- 18 at waves 1 and 2. *Journal of affective disorders*. 2001;63(1):35-41.
- 19 44. Patten SB. An analysis of data from two general health surveys found that increased incidence
- 20 and duration contributed to elevated prevalence of major depression in persons with chronic medical
- 21 conditions. *Journal of clinical epidemiology*. 2005;58(2):184-9.
- 22 45. Patten SB, Wang JL, Williams JV, Currie S. Descriptive epidemiology of major depression in
- 23 Canada. *Canadian journal of psychiatry*. 2006;51(2):84.
- 24 46. Spangenberg L, Forkmann T, Braehler E, Glaesmer H. The association of depression and
- 25 multimorbidity in the elderly: implications for the assessment of depression. *Psychogeriatrics*.
- 26 2011;11(4):227-34.
- 27 47. Katon WJ. Clinical and health services relationships between major depression, depressive
- 28 symptoms, and general medical illness. *Biological psychiatry*. 2003;54(3):216-26.
- 29 48. Zahidie A, Jamali T. An overview of the predictors of depression among adult Pakistani women.
- 30 *Journal of the College of Physicians and Surgeons Pakistan*. 2013;23(8):574.
- 31 49. Husain N, Creed F, Tomenson B. Depression and social stress in Pakistan. *Psychological*
- 32 *medicine*. 2000;30(02):395-402.
- 33 50. Lovisi GM, Lopez J, Coutinho ESF, Patel V. Poverty, violence and depression during pregnancy: a
- 34 survey of mothers attending a public hospital in Brazil. *Psychological Medicine*. 2005;35(10):1485-92.
- 35 51. Harpham T. Urbanization and mental health in developing countries: a research role for social
- 36 scientists, public health professionals and social psychiatrists. *Social science & medicine*. 1994;39(2):233-
- 37 45.
- 38 52. Hussain M, and Adam Saud. Socio-Economic Determinants of Working Children: Evidence from
- 39 Capital Territory of Islamabad, Pakistan. *Pakistan Administrative Review*. 2017;1(2):145-58.
- 40 53. Nisar N, Billoo N, Gadit A. Prevalence of depression and the associated risks factors among adult
- 41 women in a fishing community. *JPMA*. 2004;54(10):519-25.
- 42 54. Costello DM, Swendsen J, Rose JS, Dierker LC. Risk and protective factors associated with
- 43 trajectories of depressed mood from adolescence to early adulthood. *Journal of consulting and clinical*
- 44 *psychology*. 2008;76(2):173.
- 45 55. Lankarani MM, Assari S. Association between number of comorbid medical conditions and
- 46 depression among individuals with diabetes; race and ethnic variations. *Journal of Diabetes & Metabolic*
- 47 *Disorders*. 2015;14(1):1.
- 48 56. Mishra N, Nagpal SS, Chadda RK, Sood M. Help-seeking behavior of patients with mental health
- 49 problems visiting a tertiary care center in north India. *Indian journal of psychiatry*. 2011;53(3):234.
- 50 57. Mubbashar M, Saeed K. Development of mental health services in Pakistan. *Eastern*
- 51 *Mediterranean health journal*. 2001;7:392-6.
- 52
- 53
- 54
- 55
- 56
- 57
- 58
- 59
- 60

**Table 1: Socio-demographic and other characteristics of participants (n=2867)**

| Characteristics                        | n (%)       |
|----------------------------------------|-------------|
| <b>Anxiety and depressive symptoms</b> |             |
| No                                     | 2081 (72.6) |
| Yes                                    | 786 (27.4)  |
| <b>Presence of multimorbidity</b>      |             |
| No                                     | 1427 (49.8) |
| Yes                                    | 1440 (50.2) |
| <b>Age</b>                             |             |
| 30-39 years                            | 1062 (37.0) |
| 40-49 years                            | 816 (28.5)  |
| 50-59 years                            | 570 (19.9)  |
| 60-69 years                            | 293 (10.2)  |
| ≥70 years                              | 126 (4.4)   |
| <b>Gender</b>                          |             |
| Male                                   | 1477 (51.5) |
| Female                                 | 1390 (48.5) |
| <b>Education</b>                       |             |
| No education                           | 404 (14.1)  |
| Primary                                | 133 (4.6)   |
| Secondary                              | 647 (22.6)  |
| Higher/Graduation                      | 1098 (38.3) |
| Post-graduate                          | 585 (20.4)  |
| <b>Income</b>                          |             |
| <16,000                                | 638 (22.3)  |
| 16,001-24,999                          | 426 (14.9)  |
| 25,000-39,999                          | 636 (22.2)  |
| 40,000-54,999                          | 644 (22.5)  |
| >55,000                                | 523 (18.2)  |
| <b>Occupation</b>                      |             |
| Unemployed                             | 484 (16.9)  |
| Unskilled worker                       | 243 (8.5)   |
| Skilled worker                         | 250 (8.7)   |
| Labor work                             | 389 (13.6)  |
| Non-manual work                        | 296 (10.3)  |
| Professional office job                | 1205 (42)   |
| <b>Marital status</b>                  |             |

|                              |             |
|------------------------------|-------------|
| Never Married                | 272 (9.5)   |
| Currently Married            | 2437 (85.0) |
| Widowed/Separated/Divorced   | 158 (5.5)   |
| <b>Numbers of Children</b>   |             |
| No child                     | 1250 (43.6) |
| 1-2 children                 | 974 (34.0)  |
| 3 and above children         | 643 (22.4)  |
| <b>Ethnicity</b>             |             |
| Sindhi                       | 402 (14.0)  |
| Punjabi                      | 318 (11.1)  |
| Balochi                      | 94 (3.3)    |
| Pashtu                       | 176 (6.1)   |
| Urdu                         | 1534 (53.5) |
| Others                       | 343 (12.0)  |
| <b>Home Status</b>           |             |
| Own                          | 1595 (55.6) |
| Rent                         | 1155 (40.3) |
| Other Arrangement            | 117 (4.1)   |
| <b>Smoking Status</b>        |             |
| No                           | 2323 (81.0) |
| Yes                          | 544 (19.0)  |
| <b>Visiting Faith Healer</b> |             |
| No                           | 2471 (86.2) |
| Yes                          | 396 (13.8)  |

---

**Table 2: Univariate and multivariate analysis of factors associated with anxiety & depressive symptoms among adults (n=2867)**

| Anxiety and depressive symptoms   |      |           |      |            |
|-----------------------------------|------|-----------|------|------------|
| Characteristics                   | COR  | 95% CI    | AOR  | 95% CI     |
| <b>Presence of multimorbidity</b> |      |           |      |            |
| No                                | 1    |           | 1    |            |
| Yes                               | 1.39 | 1.18,1.64 | 1.33 | 1.11,1.58  |
| <b>Age</b>                        |      |           |      |            |
| 30-39 years                       | 1    |           | -    |            |
| 40-49 years                       | 0.95 | 0.77,1.77 | -    |            |
| 50-59 years                       | 1.14 | 0.92,1.40 | -    |            |
| 60-69 years                       | 1.02 | 0.78,1.40 | -    |            |
| ≥70 years                         | 1.26 | 0.85,1.88 | -    |            |
| <b>Gender</b>                     |      |           |      |            |
| Male                              | 1    |           | 1    |            |
| Female                            | 2.58 | 2.17,3.05 | 2.40 | 2.01,2.87  |
| <b>Education</b>                  |      |           |      |            |
| Post-graduate                     | 1    |           | 1    |            |
| Higher/Graduation                 | 0.89 | 0.71,1.13 | 0.86 | 0.67,1.09  |
| Secondary                         | 1.15 | 0.89,1.48 | 1.05 | 0.78,1.40  |
| Primary                           | 1.22 | 0.81,1.85 | 1.11 | 0.70,1.77  |
| No education                      | 1.95 | 1.48,2.57 | 1.51 | 1.094,2.07 |
| <b>Income</b>                     |      |           |      |            |
| >55,000                           | 1    |           | -    |            |
| 40,000-54,999                     | 0.91 | 0.69,1.17 | -    |            |
| 25,000-39,999                     | 0.99 | 0.76,1.28 | -    |            |
| 16,001-24,999                     | 1.08 | 0.81,1.43 | -    |            |
| <16,000                           | 1.02 | 0.79,1.32 | -    |            |
| <b>Occupation</b>                 |      |           |      |            |
| Professional office job           | 1    |           | 1    |            |
| Non-manual work                   | 0.78 | 0.58,1.06 | 0.81 | 0.58,1.13  |
| Labor work                        | 1.22 | 0.95,1.57 | 1.34 | 1.00,1.79  |
| Skilled worker                    | 1.15 | 0.85,1.55 | 1.29 | 0.93,1.78  |
| Unskilled worker                  | 1.17 | 0.87,1.59 | 1.06 | 0.75,1.48  |
| Unemployed                        | 0.85 | 0.71,1.14 | 0.90 | 0.68,1.18  |
| <b>Marital status</b>             |      |           |      |            |
| Currently Married                 | 1    |           | 1    |            |
| Never Married                     | 0.78 | 0.58,1.05 | 0.87 | 0.62,1.17  |
| Widowed/separated/divorced        | 1.45 | 1.03,2.03 | 1.02 | 0.72,1.48  |
| <b>Numbers of Children</b>        |      |           |      |            |
| no child                          | 1    |           | 1    |            |
| 1-2 children                      | 0.68 | 0.56,0.83 | 0.68 | 0.56,0.84  |

|                              |      |           |      |           |
|------------------------------|------|-----------|------|-----------|
| 3 and above children         | 0.84 | 0.68,1.04 | 0.74 | 0.59,0.93 |
| <b>Ethnicity</b>             |      |           |      |           |
| Sindhi                       | 1    |           | 1    |           |
| Punjabi                      | 1.84 | 1.31,2.58 | 1.66 | 1.16,2.37 |
| Balochi                      | 1.26 | 0.74,2.14 | 1.32 | 0.76,2.30 |
| Pashtu                       | 1.68 | 1.12,2.51 | 1.39 | 0.90,2.13 |
| Urdu                         | 1.45 | 1.11,1.89 | 1.35 | 1.00,1.81 |
| Others                       | 1.84 | 1.32,2.56 | 1.52 | 1.07,2.17 |
| <b>Home Status</b>           |      |           |      |           |
| Own                          | 1    |           | -    |           |
| Rent                         | 0.96 | 0.81,1.14 | -    |           |
| Other Arrangement            | 0.70 | 0.44,1.10 | -    |           |
| <b>Smoking Status</b>        |      |           |      |           |
| No                           | 1    |           | -    |           |
| Yes                          | 0.80 | 0.65,1.00 | -    |           |
| <b>Visiting Faith Healer</b> |      |           |      |           |
| No                           | 1    |           | 1    |           |
| Yes                          | 2.44 | 1.96,3.03 | 2.29 | 1.82,2.88 |

COR = unadjusted odds ratios, CI = confidence intervals.

AOR = adjusted odds ratios, only variables with p-value < 0.250 in univariate analysis were entered into adjusted model using stepwise selection (Presence of multimorbidity, Gender, Education, Occupation, Marital status, Number of children, Ethnicity, Visiting faith healer).

**Table 3: Univariate and multivariate analysis of anxiety & depressive symptom with number of chronic diseases among adults (n=2867)**

| Characteristics                   | n (%)      | Anxiety and depressive symptoms |           |      |           |
|-----------------------------------|------------|---------------------------------|-----------|------|-----------|
|                                   |            | COR                             | 95% CI    | AOR  | 95% CI    |
| <b>Number of chronic diseases</b> |            |                                 |           |      |           |
| None                              | 152 (24.6) | 1                               |           | 1    |           |
| One                               | 192 (23.7) | 0.95                            | 0.74,1.21 | 0.89 | 0.69,1.14 |
| Two                               | 181 (25.5) | 1.05                            | 0.81,1.34 | 0.98 | 0.76,1.27 |
| Three                             | 134 (29.8) | 1.30                            | 0.99,1.71 | 1.20 | 0.90,1.59 |
| Four                              | 76 (42.2)  | 2.24                            | 1.58,3.17 | 1.92 | 1.33,2.78 |
| Five +                            | 51 (50.0)  | 3.06                            | 1.99,4.70 | 2.62 | 1.66,4.13 |

COR = unadjusted odds ratios, CI = confidence intervals.

AOR = adjusted odds ratios, for all variables with p-value<0.250 in univariate analysis (Age, Gender, Education, Occupation, Marital status, Number of children, Ethnicity, Home status, Smoking status, Visiting faith healer).

|                            |                     | Reporting Item                                                                                                                                                                                                                                                       | Page Number |
|----------------------------|---------------------|----------------------------------------------------------------------------------------------------------------------------------------------------------------------------------------------------------------------------------------------------------------------|-------------|
| Title                      | <a href="#">#1a</a> | Indicate the study's design with a commonly used term in the title or the abstract                                                                                                                                                                                   | 01          |
| Abstract                   | <a href="#">#1b</a> | Provide in the abstract an informative and balanced summary of what was done and what was found                                                                                                                                                                      | 02-03       |
| Background / rationale     | <a href="#">#2</a>  | Explain the scientific background and rationale for the investigation being reported                                                                                                                                                                                 | 07          |
| Objectives                 | <a href="#">#3</a>  | State specific objectives, including any prespecified hypotheses                                                                                                                                                                                                     | 07          |
| Study design               | <a href="#">#4</a>  | Present key elements of study design early in the paper                                                                                                                                                                                                              | 08-09       |
| Setting                    | <a href="#">#5</a>  | Describe the setting, locations, and relevant dates, including periods of recruitment, exposure, follow-up, and data collection                                                                                                                                      | 08-09       |
| Eligibility criteria       | <a href="#">#6a</a> | Give the eligibility criteria, and the sources and methods of selection of participants.                                                                                                                                                                             | 08          |
|                            | <a href="#">#7</a>  | Clearly define all outcomes, exposures, predictors, potential confounders, and effect modifiers. Give diagnostic criteria, if applicable                                                                                                                             | 09-10       |
| Data sources / measurement | <a href="#">#8</a>  | For each variable of interest give sources of data and details of methods of assessment (measurement). Describe comparability of assessment methods if there is more than one group. Give information separately for for exposed and unexposed groups if applicable. | 09-11       |
| Bias                       | <a href="#">#9</a>  | Describe any efforts to address potential sources of bias                                                                                                                                                                                                            | 07          |



|                        |                      |                                                                                                                                                                                                                                                                            |              |
|------------------------|----------------------|----------------------------------------------------------------------------------------------------------------------------------------------------------------------------------------------------------------------------------------------------------------------------|--------------|
| Study size             | <a href="#">#10</a>  | Explain how the study size was arrived at                                                                                                                                                                                                                                  | 08           |
| Quantitative variables | <a href="#">#11</a>  | Explain how quantitative variables were handled in the analyses. If applicable, describe which groupings were chosen, and why                                                                                                                                              | 11-12        |
| Statistical methods    | <a href="#">#12a</a> | Describe all statistical methods, including those used to control for confounding                                                                                                                                                                                          | 11-12        |
|                        | <a href="#">#12b</a> | Describe any methods used to examine subgroups and interactions                                                                                                                                                                                                            | n/a          |
|                        | <a href="#">#12c</a> | Explain how missing data were addressed                                                                                                                                                                                                                                    | 13           |
|                        | <a href="#">#12d</a> | If applicable, describe analytical methods taking account of sampling strategy                                                                                                                                                                                             | 09           |
|                        | <a href="#">#12e</a> | Describe any sensitivity analyses                                                                                                                                                                                                                                          | n/a          |
| Participants           | <a href="#">#13a</a> | Report numbers of individuals at each stage of study—eg numbers potentially eligible, examined for eligibility, confirmed eligible, included in the study, completing follow-up, and analysed. Give information separately for exposed and unexposed groups if applicable. | n/a          |
|                        | <a href="#">#13b</a> | Give reasons for non-participation at each stage                                                                                                                                                                                                                           | n/a          |
|                        | <a href="#">#13c</a> | Consider use of a flow diagram                                                                                                                                                                                                                                             | n/a          |
| Descriptive data       | <a href="#">#14a</a> | Give characteristics of study participants (eg demographic, clinical, social) and information on exposures and potential confounders. Give information separately for exposed and unexposed groups if applicable.                                                          | 06, Table 01 |
|                        | <a href="#">#14b</a> | Indicate number of participants with missing data for each variable of interest                                                                                                                                                                                            | n/a          |

|                  |                      |                                                                                                                                                                                                          |         |
|------------------|----------------------|----------------------------------------------------------------------------------------------------------------------------------------------------------------------------------------------------------|---------|
| Outcome data     | <a href="#">#15</a>  | Report numbers of outcome events or summary measures. Give information separately for exposed and unexposed groups if applicable.                                                                        | 06-07   |
| Main results     | <a href="#">#16a</a> | Give unadjusted estimates and, if applicable, confounder-adjusted estimates and their precision (eg, 95% confidence interval). Make clear which confounders were adjusted for and why they were included | Table 3 |
|                  | <a href="#">#16b</a> | Report category boundaries when continuous variables were categorized                                                                                                                                    | 10      |
|                  | <a href="#">#16c</a> | If relevant, consider translating estimates of relative risk into absolute risk for a meaningful time period                                                                                             | n/a     |
| Other analyses   | <a href="#">#17</a>  | Report other analyses done—e.g., analyses of subgroups and interactions, and sensitivity analyses                                                                                                        | n/a     |
| Key results      | <a href="#">#18</a>  | Summarise key results with reference to study objectives                                                                                                                                                 | 13-14   |
| Limitations      | <a href="#">#19</a>  | Discuss limitations of the study, taking into account sources of potential bias or imprecision. Discuss both direction and magnitude of any potential bias.                                              | 4 & 17  |
| Interpretation   | <a href="#">#20</a>  | Give a cautious overall interpretation considering objectives, limitations, multiplicity of analyses, results from similar studies, and other relevant evidence.                                         | 18      |
| Generalisability | <a href="#">#21</a>  | Discuss the generalisability (external validity) of the study results                                                                                                                                    | 15-17   |
| Funding          | <a href="#">#22</a>  | Give the source of funding and the role of the funders for the present study and, if applicable,                                                                                                         | 18      |

1  
2  
3  
4  
5  
6  
7  
8  
9  
10  
11  
12  
13  
14  
15  
16  
17  
18  
19  
20  
21  
22  
23  
24  
25  
26  
27  
28  
29  
30  
31  
32  
33  
34  
35  
36  
37  
38  
39  
40  
41  
42  
43  
44  
45  
46  
47  
48  
49  
50  
51  
52  
53  
54  
55  
56  
57  
58  
59  
60

|  |  |                                                              |  |
|--|--|--------------------------------------------------------------|--|
|  |  | for the original study on which the present article is based |  |
|--|--|--------------------------------------------------------------|--|

For peer review only
